# Supplementary material for: Long non-coding RNA NMRAL2P promotes glycolysis and reduces ROS in head and neck tumors by interacting with the ENO1 protein and promoting GPX2 transcription
Source: PeerJ journal article supplement (doi:10.7717/peerj.16140), 2023-10-02

Project: YE8451F ABX16537.SQD Contig 1

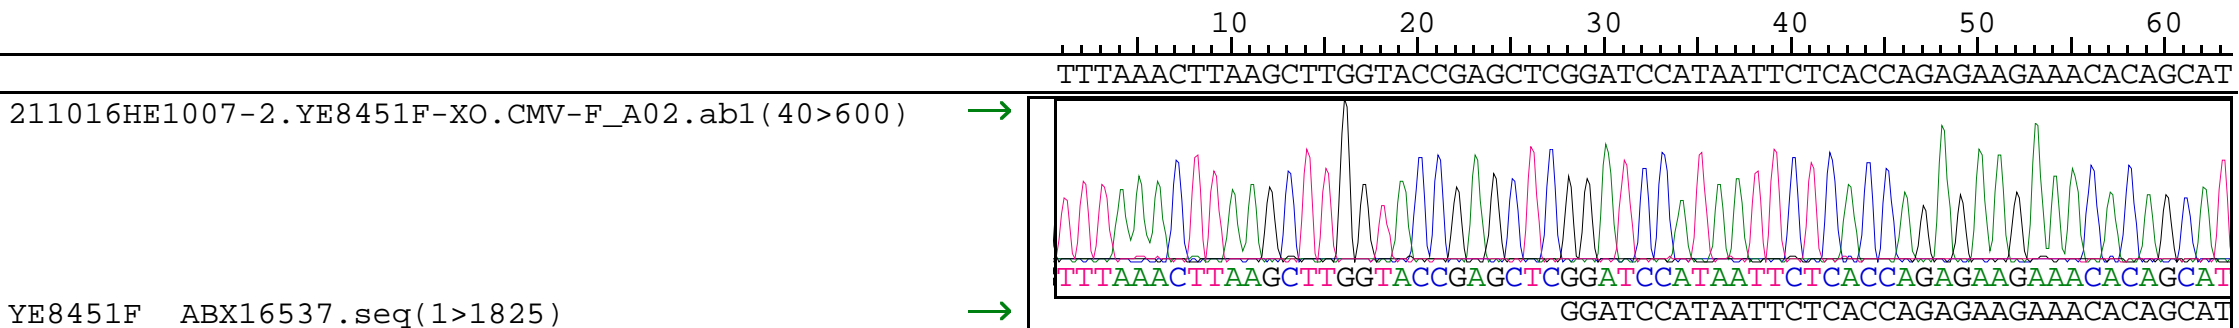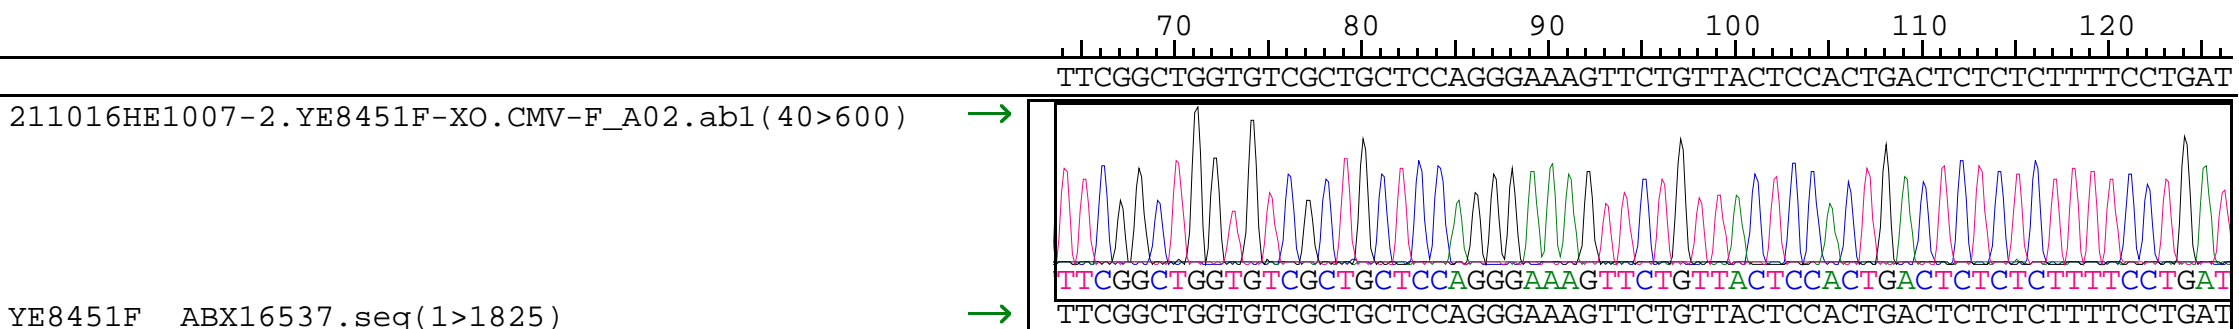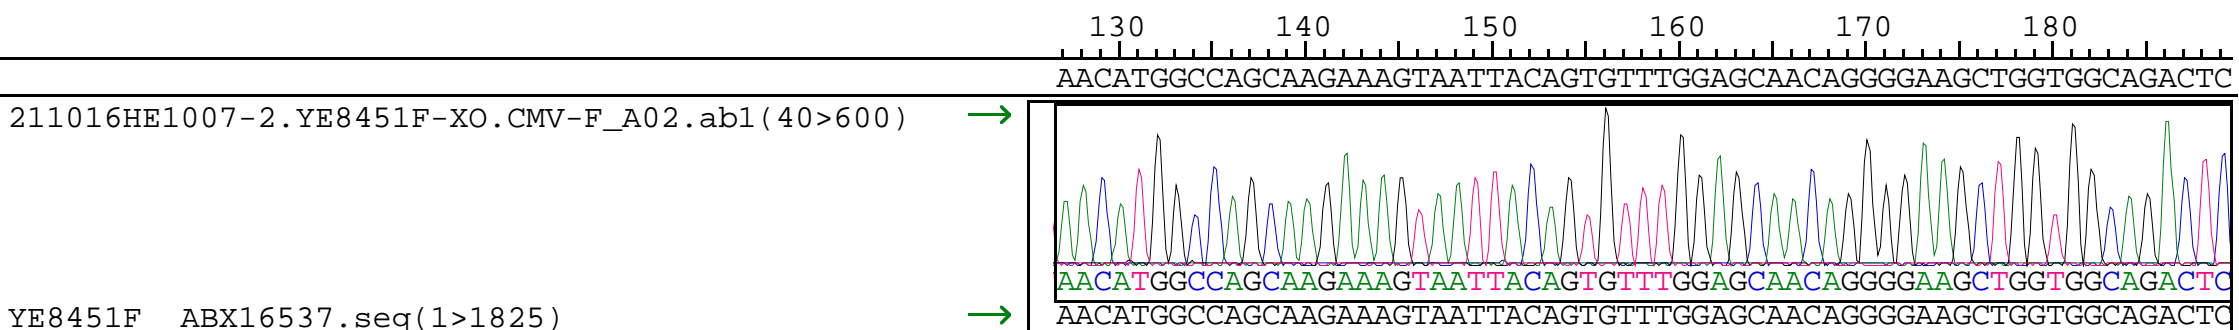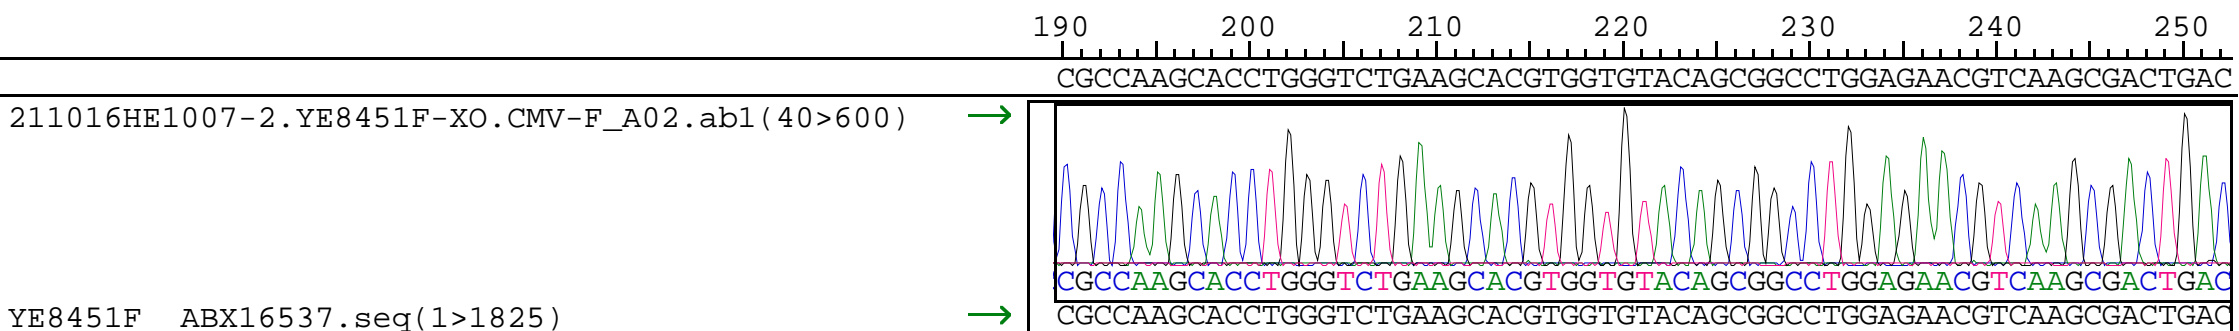

Project: YE8451F ABX16537.SQD Contig 1

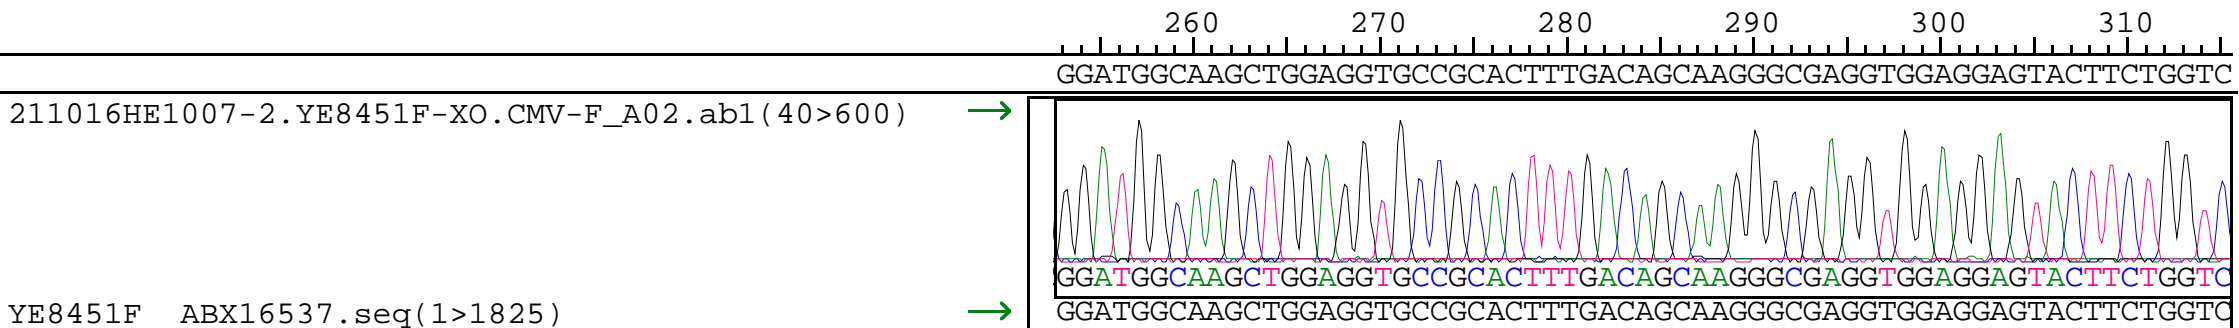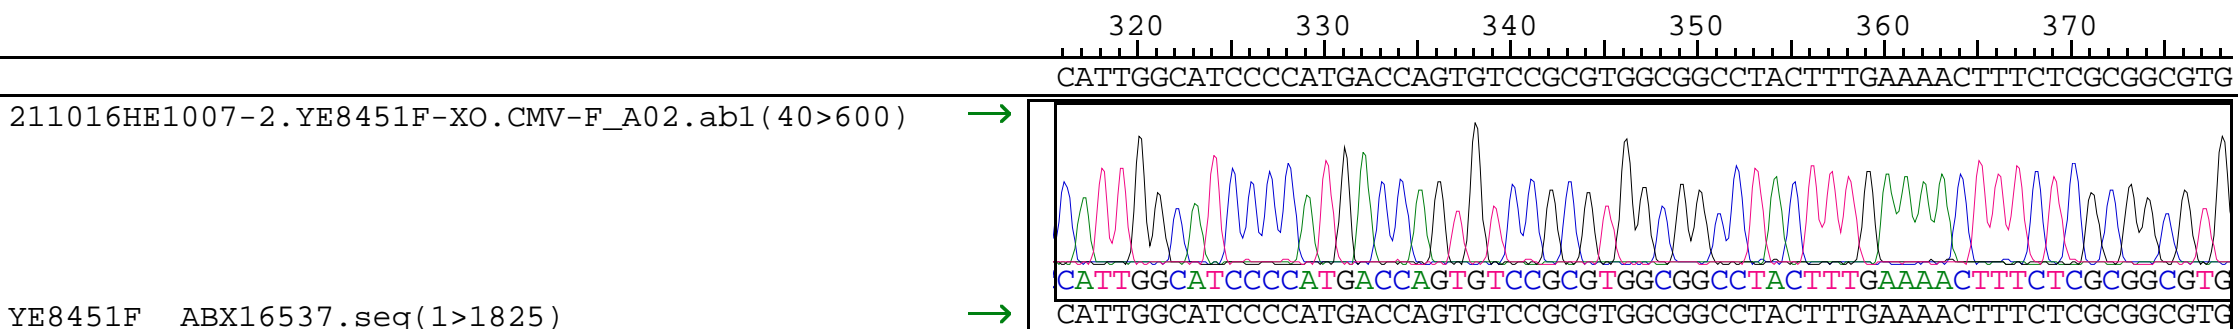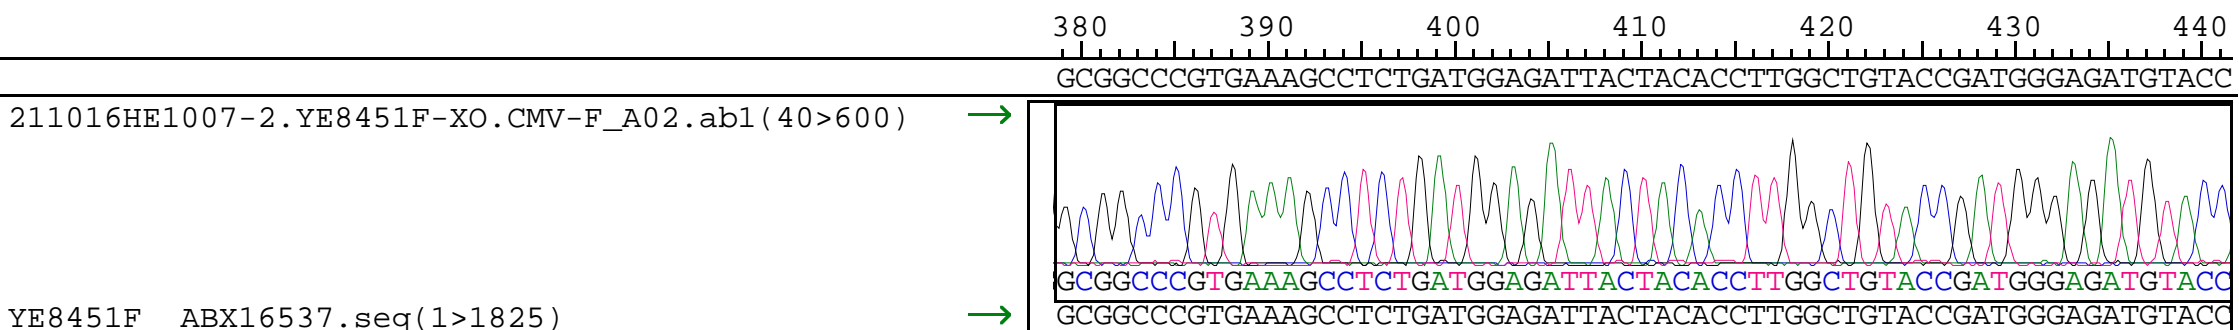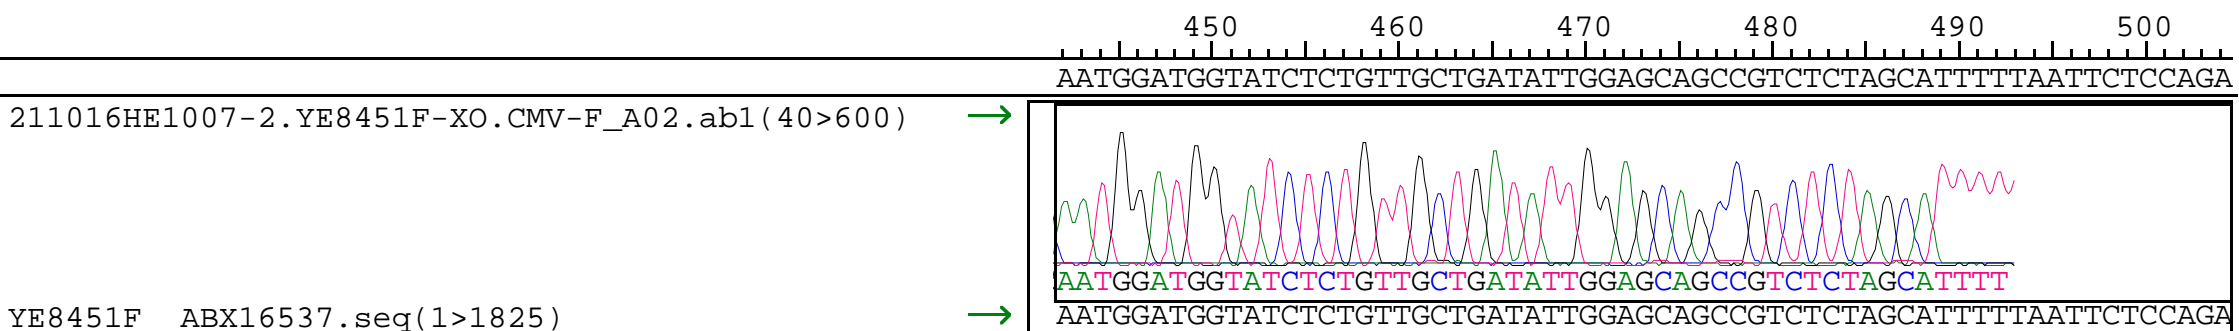



Project: YE8451F ABX16537.SQD Contig 1

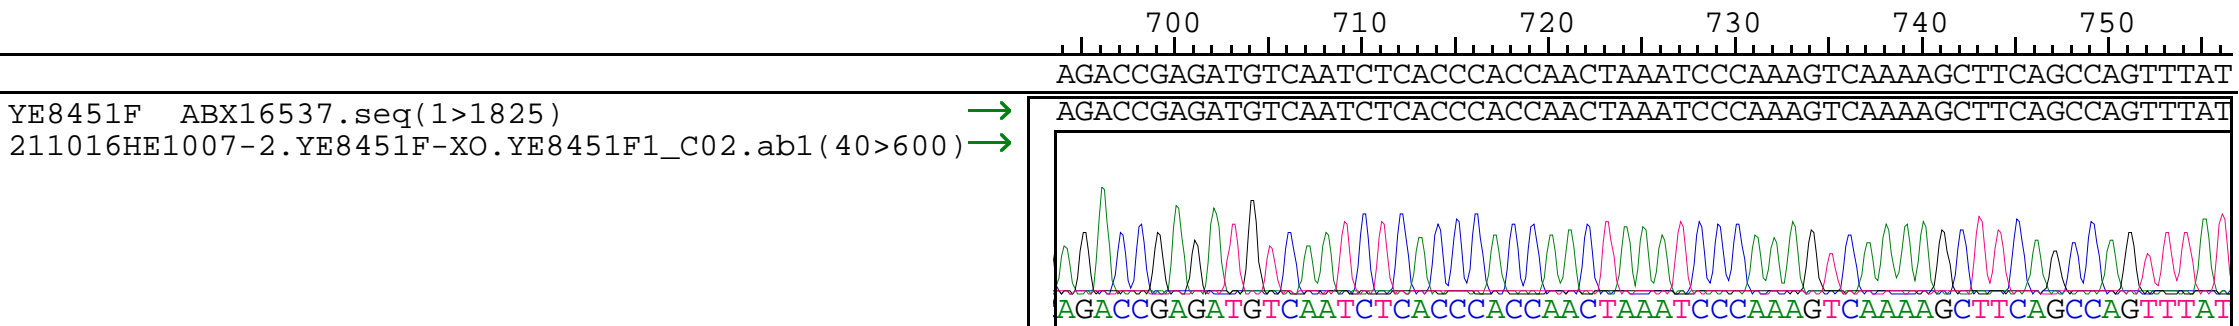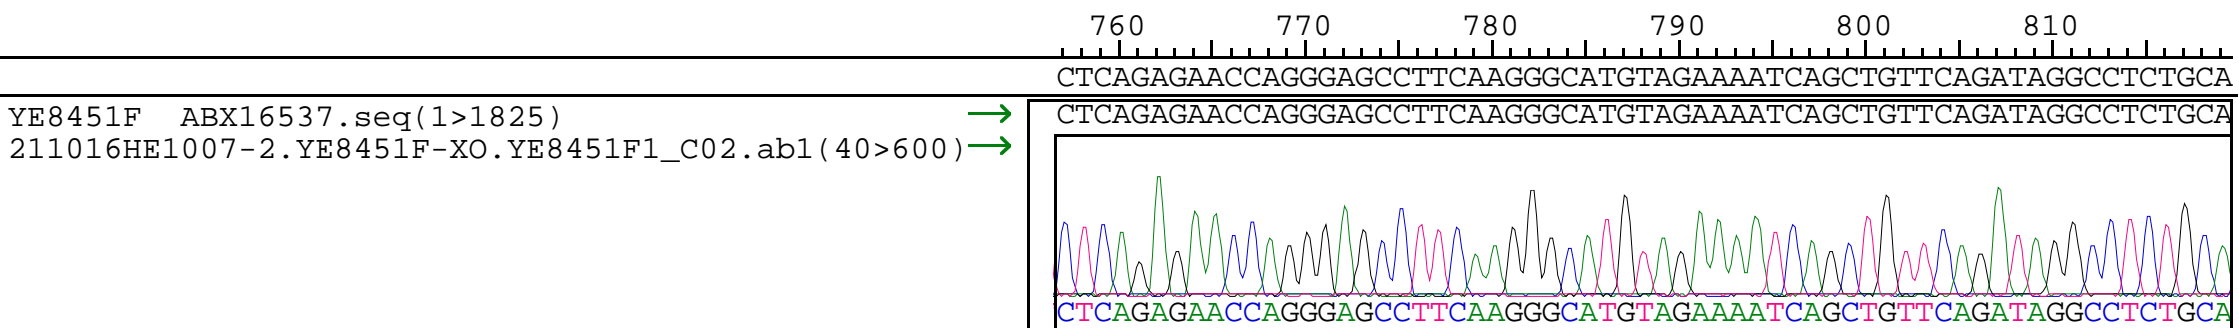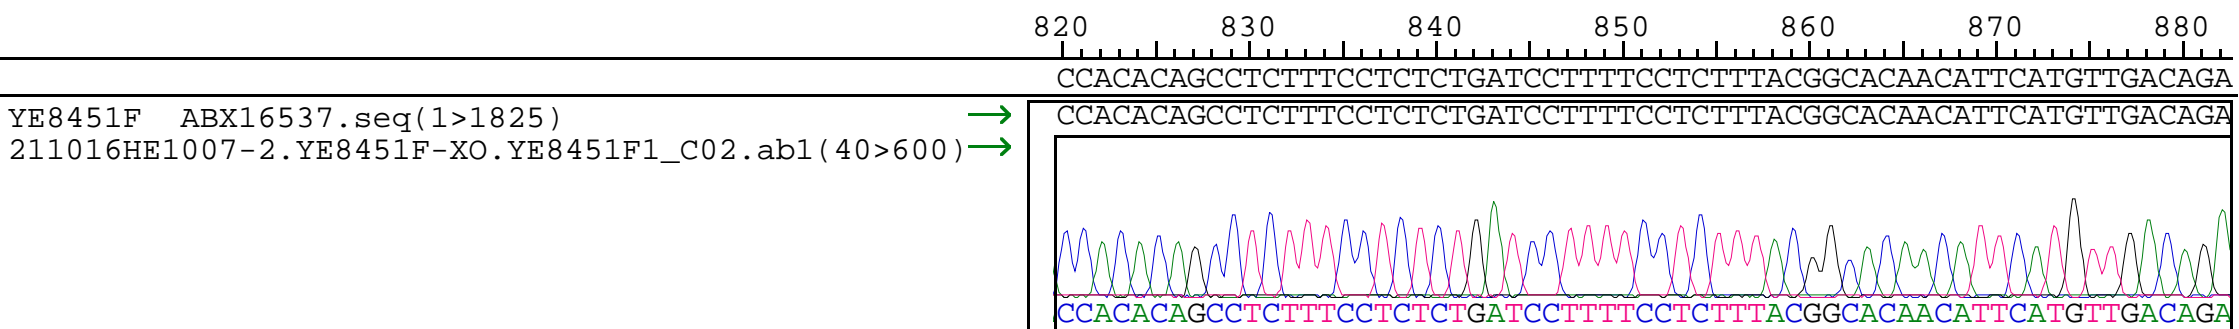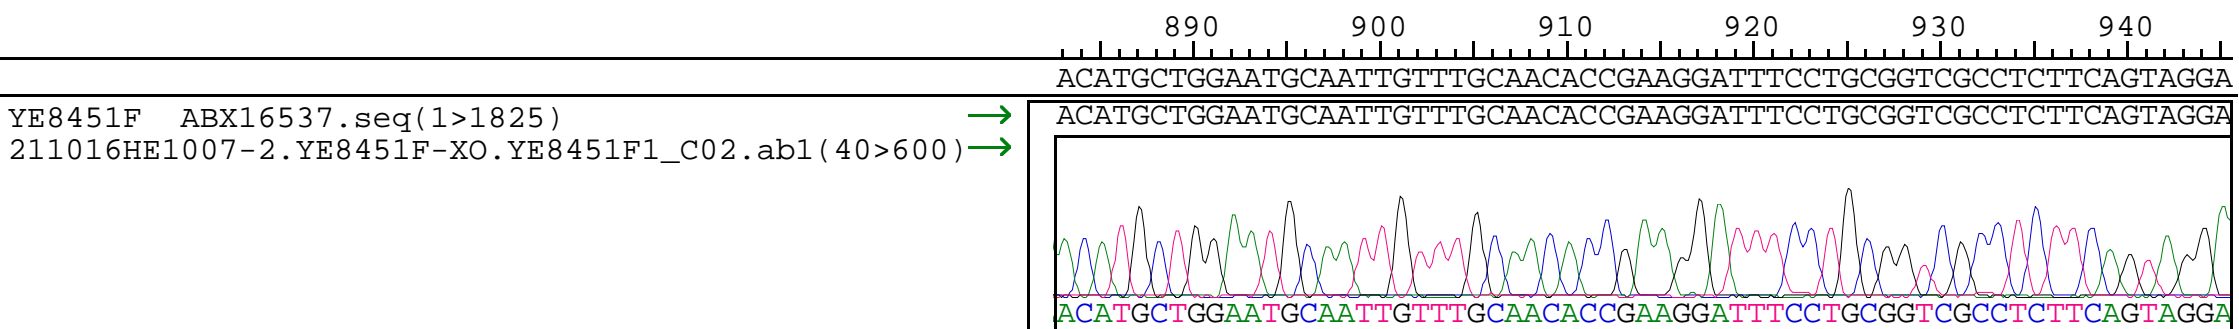



Project: YE8451F ABX16537.SQD Contig 1

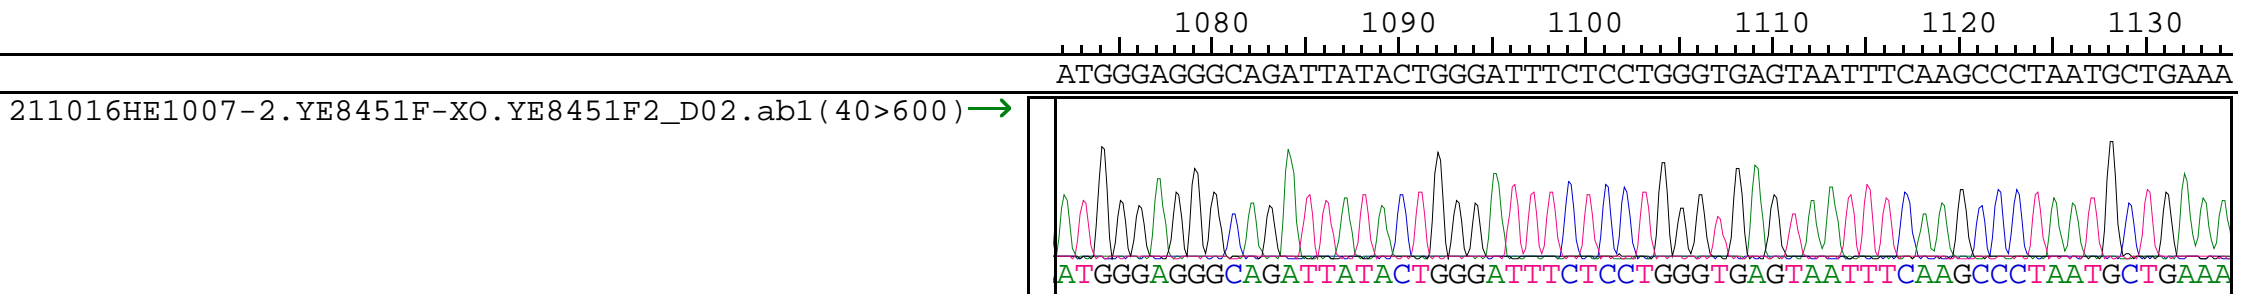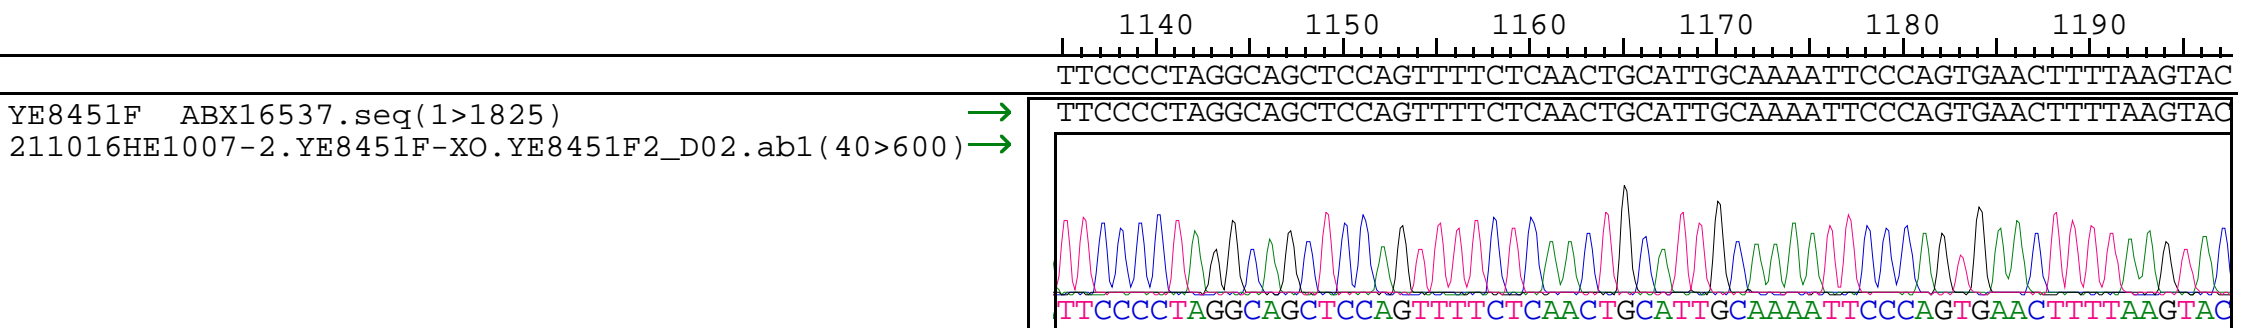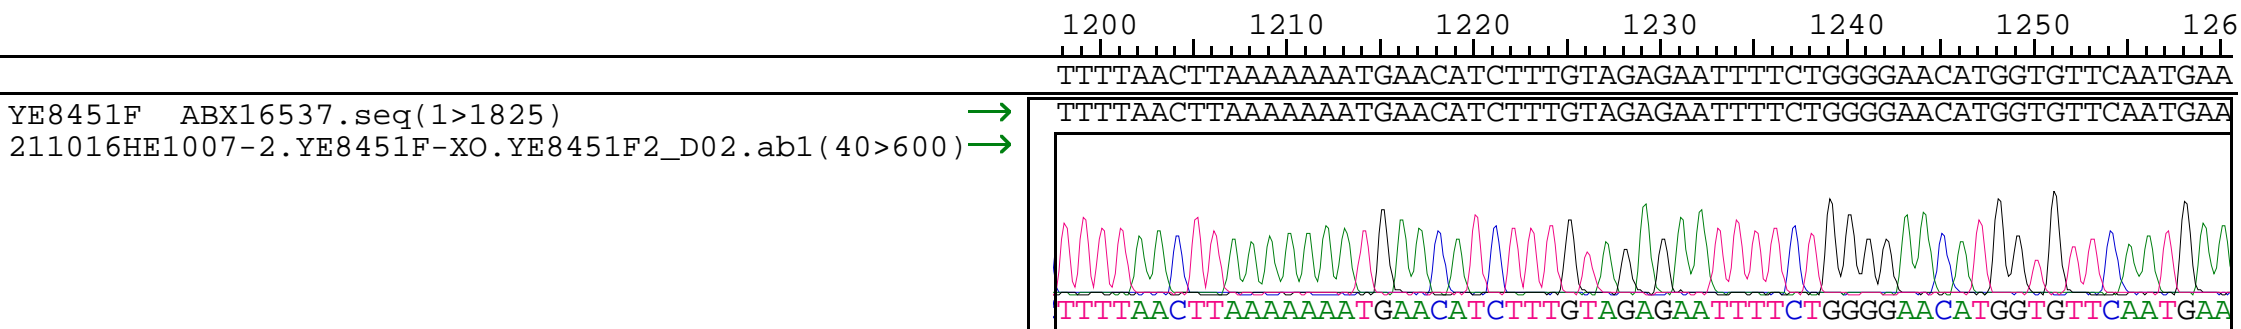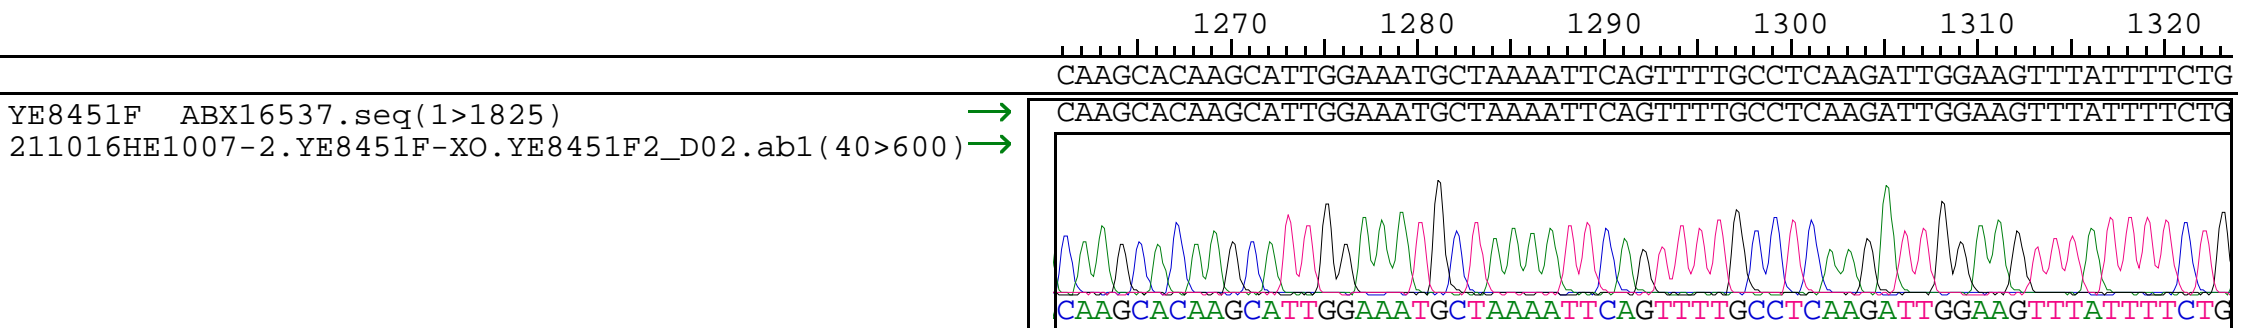

Project: YE8451F ABX16537.SQD Contig 1

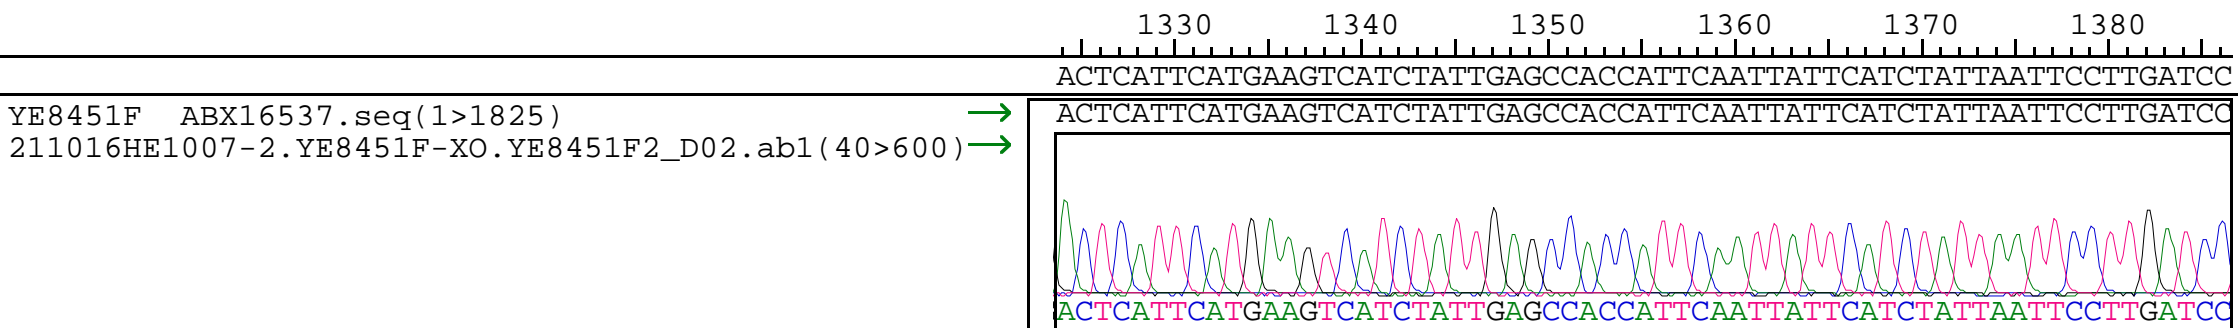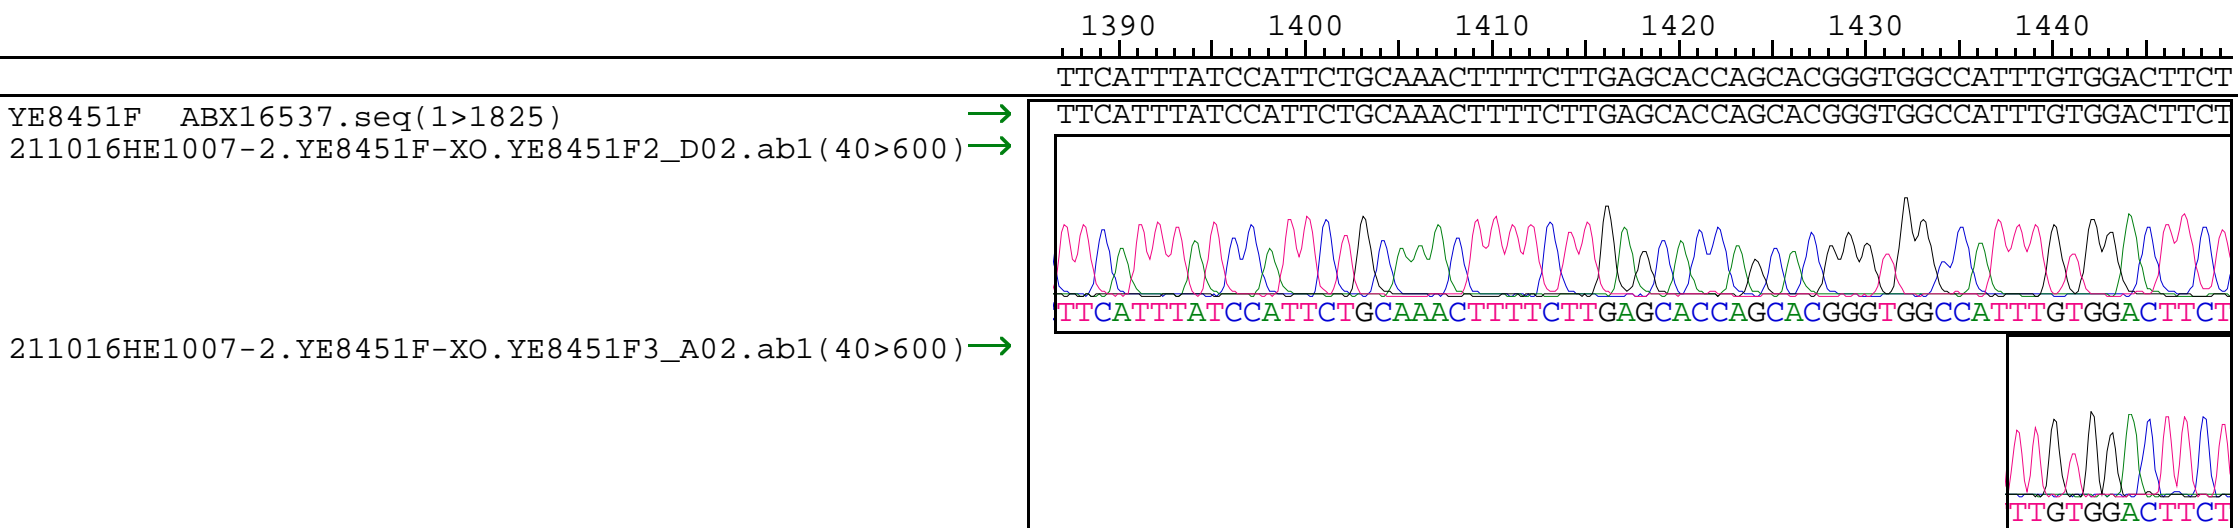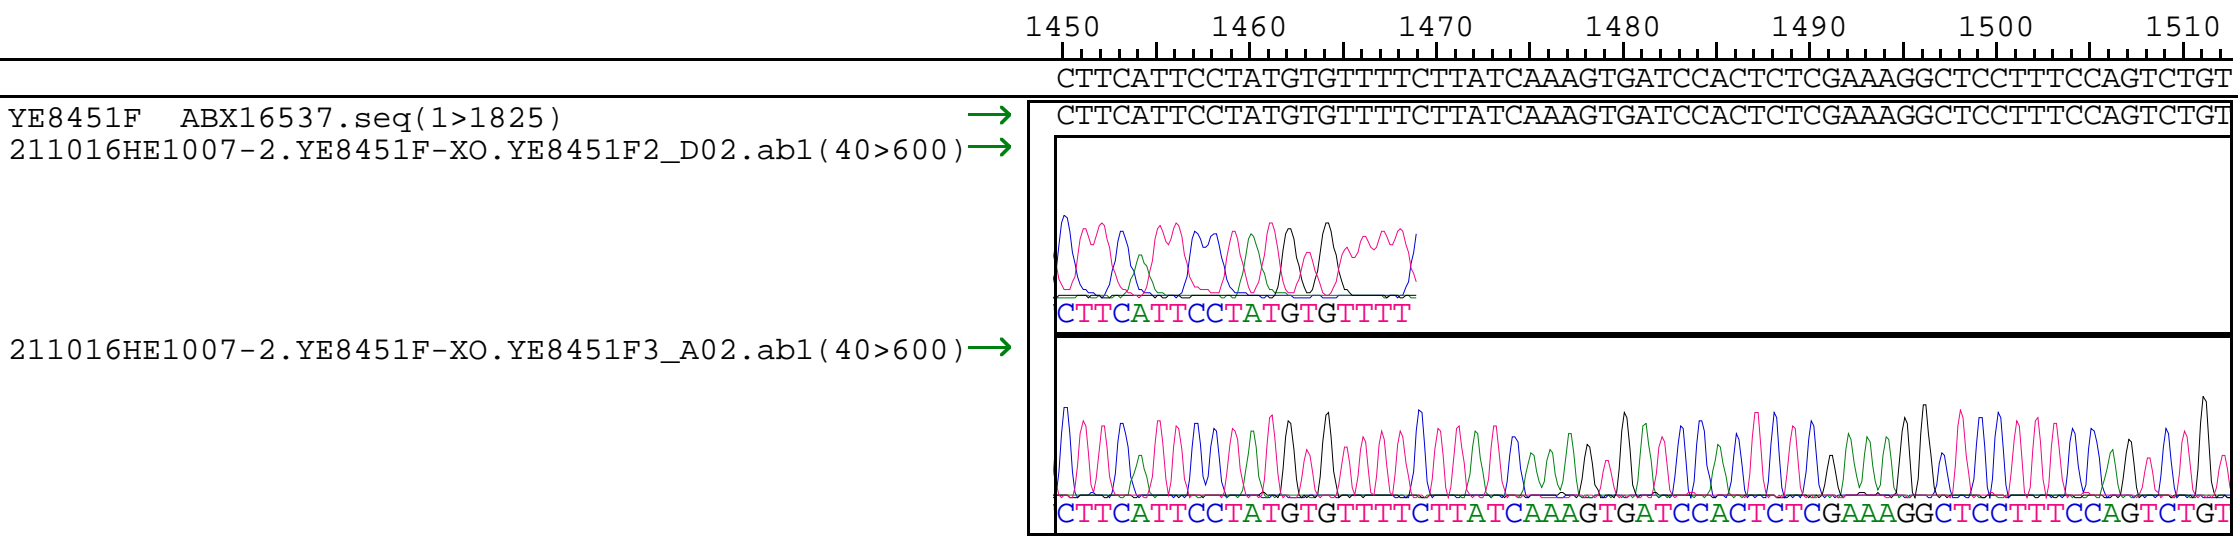

Project: YE8451F ABX16537.SQD Contig 1

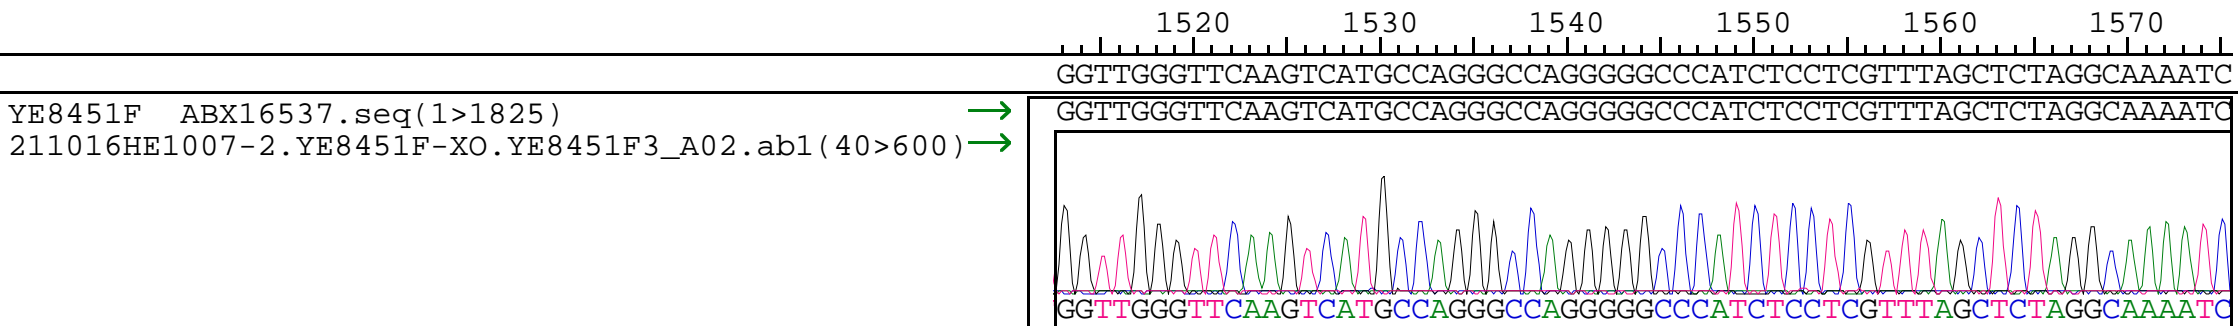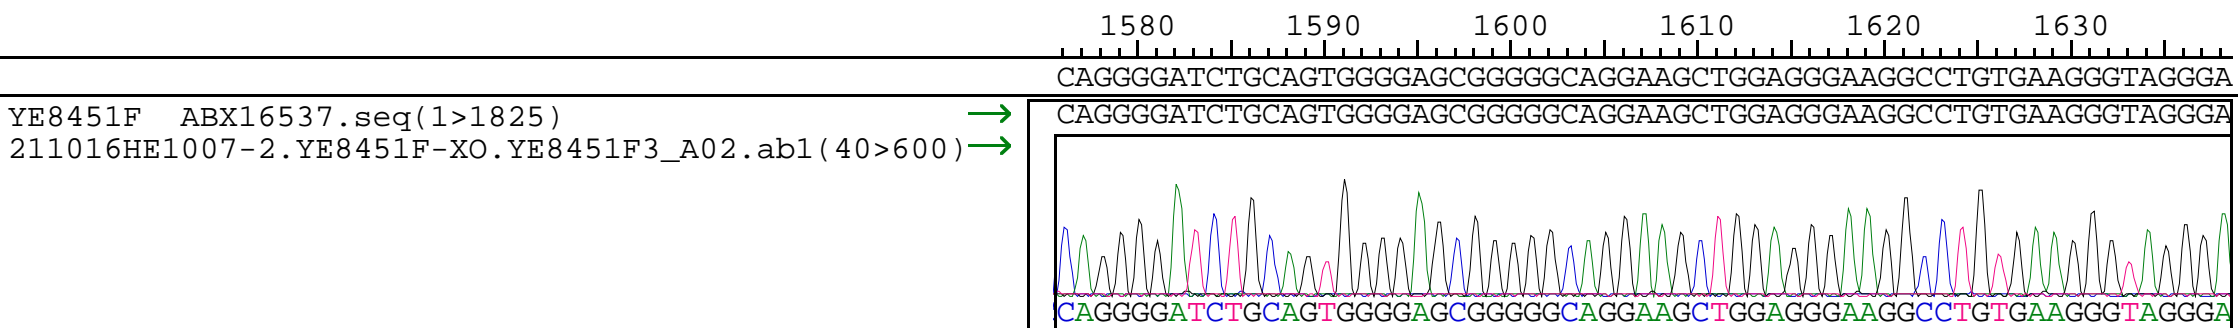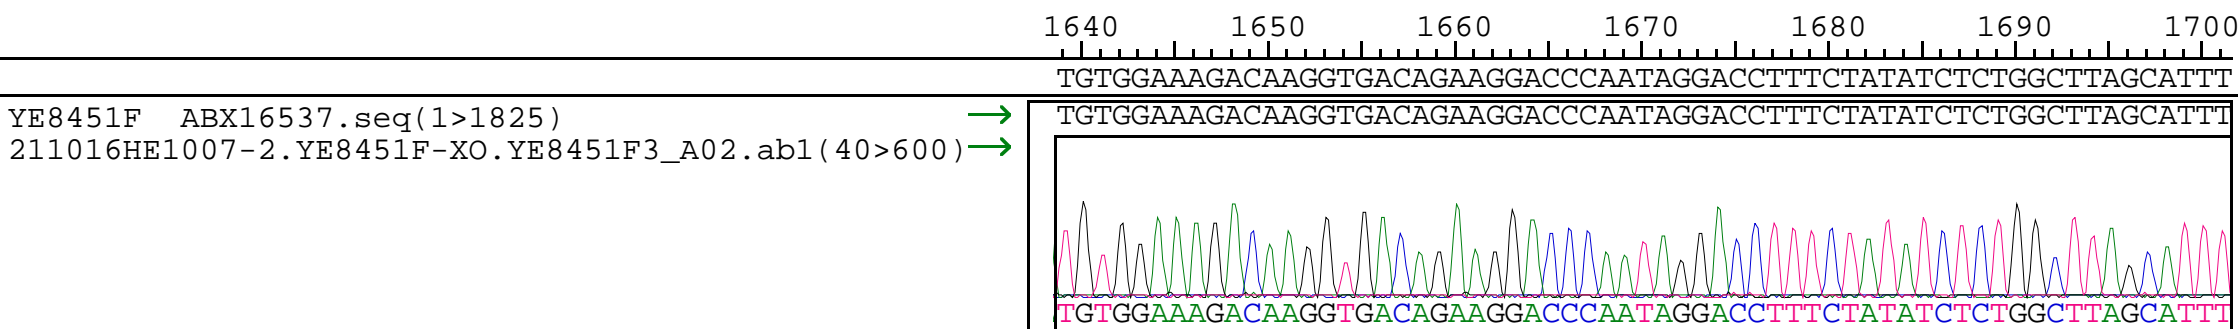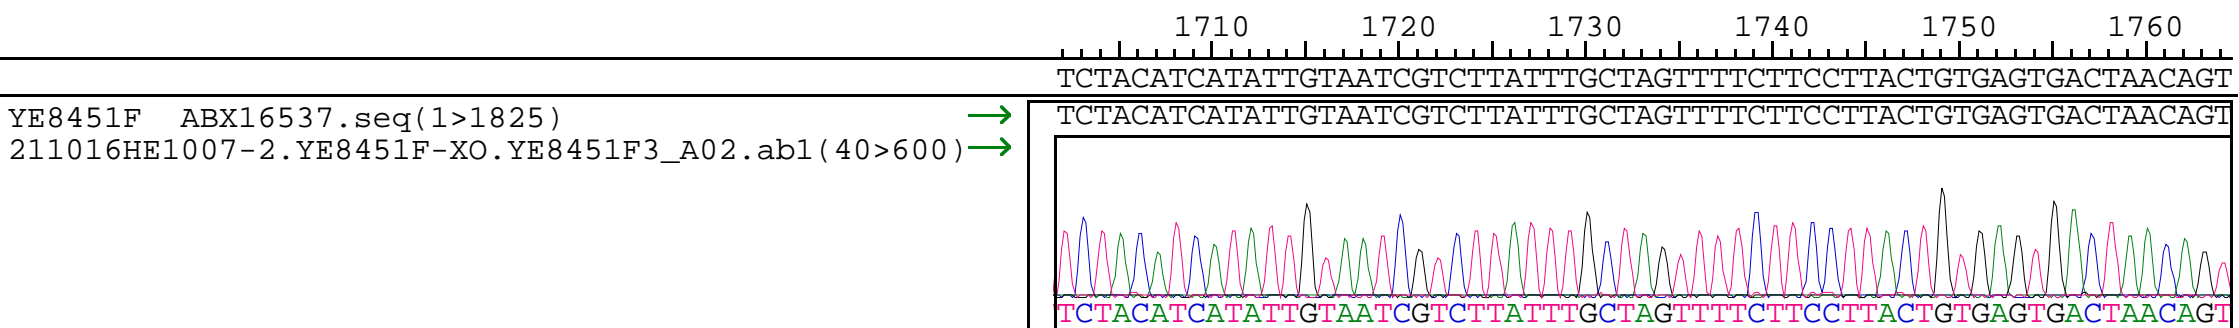



1770 1780 1790 1800 1810 1820  
CATCTTTATCCCAGTGCCTGGTACATAATAAGTGATCAATAAATGTTGATTGACTAAATGAGT

YE8451F ABX16537.seq(1>1825) →  
211016HE1007-2.YE8451F-XO.YE8451F3\_A02.ab1(40>600) →

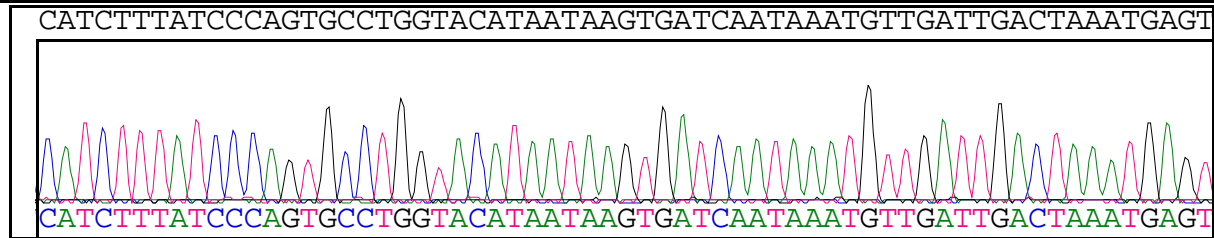

1830 1840 1850 1860 1870  
AAAAAAAAAAAAAAAAAGAAATTCCTGCAGATATCCAGCACAGTGGCG

YE8451F ABX16537.seq(1>1825) →  
211016HE1007-2.YE8451F-XO.YE8451F3\_A02.ab1(40>600) →

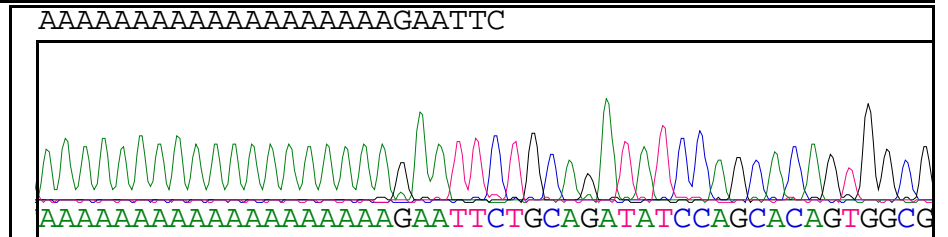

Supplement: Supplementary_file_1.pdf [file Supplementary_file_1.pdf]
