# Supplementary material for: Long non-coding RNA NMRAL2P promotes glycolysis and reduces ROS in head and neck tumors by interacting with the ENO1 protein and promoting GPX2 transcription
Source: PeerJ. 2023 Oct 2;11:e16140. doi: 10.7717/peerj.16140 (PMC10552744; doi:10.7717/peerj.16140)
Supplement: Supplemental Information 3 [file peerj-11-16140-s003.xlsx]

## Sheet:  data
Target	Content	Cq
Vector+RIP	Unkn	30.9879	27.281	3.70689	4.14402	-0.437131	1.35391
Vector+RIP	Unkn	31.2021	27.4205	3.78164	4.14402	-0.362377	1.28554
Vector+RIP	Unkn	31.224	26.2805	4.94353	4.14402	0.799507	0.574545
Vector+input	Unkn	27.281
Vector+input	Unkn	27.4205
Vector+input	Unkn	26.2805
ENO1-A+RIP	Unkn	30.2084	26.7844	3.42397	4.14402	-0.720051	1.64724
ENO1-A+RIP	Unkn	30.2046	26.8216	3.38297	4.14402	-0.761048	1.69472
ENO1-A+RIP	Unkn	30.58	26.7134	3.86657	4.14402	-0.27745	1.21205
ENO1-A+input	Unkn	26.7844
ENO1-A+input	Unkn	26.8216
ENO1-A+input	Unkn	26.7134
ENO1-B+RIP	Unkn	30.3789	26.1299	4.24901	4.14402	0.104992	0.92981
ENO1-B+RIP	Unkn	30.2598	26.3159	3.94395	4.14402	-0.200072	1.14876
ENO1-B+RIP	Unkn	29.9856	26.3812	3.60433	4.14402	-0.53969	1.45366
ENO1-B+input	Unkn	26.1299
ENO1-B+input	Unkn	26.3159
ENO1-B+input	Unkn	26.3812
ENO1-C+RIP	Unkn	27.801	26.4571	1.34393	4.14402	-2.80008	6.96481
ENO1-C+RIP	Unkn	27.7664	26.5854	1.18101	4.14402	-2.96301	7.7975
ENO1-C+RIP	Unkn	27.7625	26.5993	1.16313	4.14402	-2.98088	7.8947
ENO1-C+input	Unkn	26.4571
ENO1-C+input	Unkn	26.5854
ENO1-C+input	Unkn	26.5993
ENO1-FL+RIP	Unkn	27.5683	26.8627	0.705609	4.14402	-3.43841	10.8409
ENO1-FL+RIP	Unkn	27.6946	27.0061	0.68847	4.14402	-3.45555	10.9704
ENO1-FL+RIP	Unkn	27.693	26.9747	0.718284	4.14402	-3.42573	10.746
ENO1-FL+input	Unkn	26.8627
ENO1-FL+input	Unkn	27.0061
ENO1-FL+input	Unkn	26.9747
