# Supplementary material for: Long non-coding RNA NMRAL2P promotes glycolysis and reduces ROS in head and neck tumors by interacting with the ENO1 protein and promoting GPX2 transcription
Source: PeerJ. 2023 Oct 2;11:e16140. doi: 10.7717/peerj.16140 (PMC10552744; doi:10.7717/peerj.16140)
Supplement: Supplemental Information 13 [file peerj-11-16140-s013.zip]

Archive with 8 entries (8 files):
- Supplementary file 3/CoA of 1-434aa in pcDNA3.1.pdf
- Supplementary file 3/CoA of 1-97aa in pcDNA3.1.pdf
- Supplementary file 3/CoA of 237-434 in pcDNA3.1.pdf
- Supplementary file 3/CoA of 97-237aa in pcDNA3.1.pdf
- Supplementary file 3/Fig4C Sequencing result 1-434aa in pcDNA3.1.pdf
- Supplementary file 3/Fig4C Sequencing result 1-97aa in pcDNA3.1.pdf
- Supplementary file 3/Fig4C Sequencing result 237-434aa in pcDNA3.1.pdf
- Supplementary file 3/Fig4C Sequencing result 97-237aa in pcDNA3.1.pdf
