# Supplementary material for: Long non-coding RNA NMRAL2P promotes glycolysis and reduces ROS in head and neck tumors by interacting with the ENO1 protein and promoting GPX2 transcription
Source: PeerJ. 2023 Oct 2;11:e16140. doi: 10.7717/peerj.16140 (PMC10552744; doi:10.7717/peerj.16140)
Supplement: Supplemental Information 14 [file peerj-11-16140-s014.xlsx]

## Sheet: Proteins
Accession	Description	Coverage [%]	# Peptides	# PSMs	# Unique Peptides	# AAs	MW [kDa]	calc. pI	Abundances (Grouped): lncRNA-lgG组	Abundances (Grouped): lncRNA-RIP组
P35908	Keratin, type II cytoskeletal 2 epidermal OS=Homo sapiens OX=9606 GN=KRT2 PE=1 SV=2	73	42	109	33	639	65.4	8	4.55816e+09	3.6175e+09
H6VRF8	Cytokeratin-1 OS=Homo sapiens OX=9606 GN=KRT1 PE=3 SV=1	60	37	123	32	644	66	8.12	6.01294e+09	4.04005e+09
P35527	Keratin, type I cytoskeletal 9 OS=Homo sapiens OX=9606 GN=KRT9 PE=1 SV=3	74	32	118	32	623	62	5.24	4.73286e+09	2.95737e+09
A0A1B0GVI3	Keratin, type I cytoskeletal 10 OS=Homo sapiens OX=9606 GN=KRT10 PE=1 SV=2	50	27	85	21	624	63.3	5.26	7.46048e+09	4.61573e+09
P48668	Keratin, type II cytoskeletal 6C OS=Homo sapiens OX=9606 GN=KRT6C PE=1 SV=3	56	32	66	1	564	60	8		6.81699e+06
P04259	Keratin, type II cytoskeletal 6B OS=Homo sapiens OX=9606 GN=KRT6B PE=1 SV=5	56	32	70	2	564	60	8	2.3117e+07	1.04841e+08
P02538	Keratin, type II cytoskeletal 6A OS=Homo sapiens OX=9606 GN=KRT6A PE=1 SV=3	56	32	65	2	564	60	8	2.57296e+08	7.20787e+08
P02533	Keratin, type I cytoskeletal 14 OS=Homo sapiens OX=9606 GN=KRT14 PE=1 SV=4	54	22	63	7	472	51.5	5.16	2.66e+08	2.74559e+08
P08779	Keratin, type I cytoskeletal 16 OS=Homo sapiens OX=9606 GN=KRT16 PE=1 SV=4	51	23	55	5	473	51.2	5.05	3.39683e+08	6.80758e+08
P13647	Keratin, type II cytoskeletal 5 OS=Homo sapiens OX=9606 GN=KRT5 PE=1 SV=3	48	28	53	17	590	62.3	7.74	3.93478e+08	3.30236e+08
Q86YZ3	Hornerin OS=Homo sapiens OX=9606 GN=HRNR PE=1 SV=2	17	14	24	14	2850	282.2	10.04	3.20732e+07	5.99803e+07
P02768	Albumin OS=Homo sapiens OX=9606 GN=ALB PE=1 SV=2	29	17	49	17	609	69.3	6.28	4.01901e+08	1.75533e+08
Q04695	Keratin, type I cytoskeletal 17 OS=Homo sapiens OX=9606 GN=KRT17 PE=1 SV=2	44	17	47	9	432	48.1	5.02	5.98466e+07	1.11032e+08
P15924	Desmoplakin OS=Homo sapiens OX=9606 GN=DSP PE=1 SV=3	9	26	36	26	2871	331.6	6.81	6.29109e+07	6.30368e+07
P35754	Glutaredoxin-1 OS=Homo sapiens OX=9606 GN=GLRX PE=1 SV=2	83	7	44	7	106	11.8	8.09	4.79967e+08	2.34919e+08
Q16195	Keratin (Fragment) OS=Homo sapiens OX=9606 GN=keratin PE=2 SV=1	52	11	20	1	244	27.6	4.83		3260075
A0A2R8Y793	Actin, cytoplasmic 1 (Fragment) OS=Homo sapiens OX=9606 GN=ACTB PE=1 SV=1	37	10	22	4	309	34.1	5.17	5.56228e+07	2.3778e+08
A8K3K1	cDNA FLJ78096, highly similar to Homo sapiens actin, alpha, cardiac muscle (ACTC), mRNA OS=Homo sapiens OX=9606 PE=2 SV=1	24	9	23	2	377	42	5.39	1.36838e+07	6.71798e+07
Q07666	KH domain-containing, RNA-binding, signal transduction-associated protein 1 OS=Homo sapiens OX=9606 GN=KHDRBS1 PE=1 SV=1	29	9	15	9	443	48.2	8.66	1.56216e+08	8.74683e+08
O43852	Calumenin OS=Homo sapiens OX=9606 GN=CALU PE=1 SV=2	37	9	15	2	315	37.1	4.64		6.22508e+06
B4DUQ1	Heterogeneous nuclear ribonucleoprotein K OS=Homo sapiens OX=9606 PE=2 SV=1	36	14	17	14	439	48.5	5.92	7.66959e+06	6.09145e+07
A0A024R755	Calumenin OS=Homo sapiens OX=9606 GN=CALU PE=3 SV=1	35	10	17	3	315	37.1	4.59	1.25689e+07	7.0127e+07
P11021	Endoplasmic reticulum chaperone BiP OS=Homo sapiens OX=9606 GN=HSPA5 PE=1 SV=2	23	13	15	11	654	72.3	5.16	5.10389e+07	5.6652e+07
P52597	Heterogeneous nuclear ribonucleoprotein F OS=Homo sapiens OX=9606 GN=HNRNPF PE=1 SV=3	20	6	12	4	415	45.6	5.58	536362	2.22004e+07
Q02413	Desmoglein-1 OS=Homo sapiens OX=9606 GN=DSG1 PE=1 SV=2	16	13	18	13	1049	113.7	5.03	1.84098e+07	2.18952e+07
Q8IWP6	Tubulin beta chain OS=Homo sapiens OX=9606 PE=2 SV=1	33	12	17	1	445	49.7	4.92		5.85289e+06
B4DE59	Junction plakoglobin OS=Homo sapiens OX=9606 PE=2 SV=1	17	9	26	1	563	62.6	5.17	8.3894e+06	8.83105e+06
P31943	Heterogeneous nuclear ribonucleoprotein H OS=Homo sapiens OX=9606 GN=HNRNPH1 PE=1 SV=4	21	7	11	4	449	49.2	6.3	513482	8.51207e+07
B4DY90	Tubulin beta chain OS=Homo sapiens OX=9606 PE=2 SV=1	31	12	16	2	464	52	4.92	9.00576e+07	1.71812e+08
P14923	Junction plakoglobin OS=Homo sapiens OX=9606 GN=JUP PE=1 SV=3	20	12	17	9	745	81.7	6.14	4.85823e+07	2.56708e+07
E9PKE3	Heat shock cognate 71 kDa protein OS=Homo sapiens OX=9606 GN=HSPA8 PE=1 SV=1	21	11	13	5	627	68.8	5.52	1.66323e+07	3.41552e+07
Q7Z794	Keratin, type II cytoskeletal 1b OS=Homo sapiens OX=9606 GN=KRT77 PE=1 SV=3	20	11	21	8	578	61.9	5.99	5.17524e+06	1.24786e+07
B4DP00	cDNA FLJ58205, highly similar to Heterogeneous nuclear ribonucleoprotein H' OS=Homo sapiens OX=9606 PE=2 SV=1	21	5	9	3	355	38.7	6.54	1.44451e+06	1.25631e+06
O95678	Keratin, type II cytoskeletal 75 OS=Homo sapiens OX=9606 GN=KRT75 PE=1 SV=2	16	11	18	1	551	59.5	7.74	5.93504e+06
Q53F48	Heterogeneous nuclear ribonucleoprotein H3 isoform a variant (Fragment) OS=Homo sapiens OX=9606 PE=2 SV=1	22	6	9	6	346	36.9	7.34	1.88429e+06	2.03792e+07
A8MXL6	GATOR complex protein SEC13 OS=Homo sapiens OX=9606 GN=SEC13 PE=1 SV=1	22	4	6	4	284	31.6	5.82		25985661
B7Z6Z4	Myosin light polypeptide 6 OS=Homo sapiens OX=9606 GN=MYL6 PE=1 SV=1	28	6	14	6	238	26.7	5.08	2.61117e+07	1.73921e+08
P50402	Emerin OS=Homo sapiens OX=9606 GN=EMD PE=1 SV=1	32	6	9	6	254	29	5.5	8.28186e+06	5.55663e+07
Q8N1N4	Keratin, type II cytoskeletal 78 OS=Homo sapiens OX=9606 GN=KRT78 PE=1 SV=2	18	9	12	8	520	56.8	6.02	2.43186e+07	1.77756e+07
F1T0I1	Protein transport protein sec16 OS=Homo sapiens OX=9606 GN=SEC16A PE=1 SV=1	5	9	10	9	2334	249.3	5.85	2.89539e+06	3.10011e+07
Q3ZCM7	Tubulin beta-8 chain OS=Homo sapiens OX=9606 GN=TUBB8 PE=1 SV=2	16	7	12	1	444	49.7	4.89		1948736
B4DJI2	cDNA FLJ53342, highly similar to Granulins OS=Homo sapiens OX=9606 PE=2 SV=1	17	8	10	8	530	56.8	6.87	4.74659e+07	7.01799e+07
O00571	ATP-dependent RNA helicase DDX3X OS=Homo sapiens OX=9606 GN=DDX3X PE=1 SV=3	13	8	9	8	662	73.2	7.18	467110	1.57348e+07
P08670	Vimentin OS=Homo sapiens OX=9606 GN=VIM PE=1 SV=4	20	9	9	9	466	53.6	5.12		9.0442e+06
K7ERE3	Keratin, type I cytoskeletal 13 OS=Homo sapiens OX=9606 GN=KRT13 PE=1 SV=1	17	8	22	3	415	45.2	4.81	4.41745e+06	865718
P19474	E3 ubiquitin-protein ligase TRIM21 OS=Homo sapiens OX=9606 GN=TRIM21 PE=1 SV=1	19	9	10	9	475	54.1	6.38	739556	4.99197e+07
H0YIQ2	YLP motif-containing protein 1 (Fragment) OS=Homo sapiens OX=9606 GN=YLPM1 PE=1 SV=1	6	8	10	8	1595	180.2	6.43	2.75714e+06	4.02839e+07
Q14257	Reticulocalbin-2 OS=Homo sapiens OX=9606 GN=RCN2 PE=1 SV=1	17	5	7	5	317	36.9	4.4	1.08803e+07	6.93909e+07
A0A2R8YFE2	Actin, cytoplasmic 1 (Fragment) OS=Homo sapiens OX=9606 GN=ACTB PE=1 SV=1	51	3	7	2	79	8.8	9.2		8688007
P54652	Heat shock-related 70 kDa protein 2 OS=Homo sapiens OX=9606 GN=HSPA2 PE=1 SV=1	14	7	8	1	639	70	5.74		1.38129e+06
A8K6U7	cDNA FLJ78252, highly similar to Homo sapiens heterogeneous nuclear ribonucleoprotein U-like 1 (HNRPUL1), transcript variant 1, mRNA OS=Homo sapiens OX=9606 PE=2 SV=1	9	6	8	6	856	95.6	6.92	1.03563e+06	9.08203e+06
B4DYY5	cDNA FLJ55671, highly similar to Ubiquitin-associated protein 2-like OS=Homo sapiens OX=9606 PE=2 SV=1	5	4	5	4	1078	113.5	6.68		8817844
H0Y4R1	Inosine-5'-monophosphate dehydrogenase OS=Homo sapiens OX=9606 GN=IMPDH2 PE=1 SV=2	12	5	6	5	538	58.3	7.27		3.57473e+06
P09382	Galectin-1 OS=Homo sapiens OX=9606 GN=LGALS1 PE=1 SV=2	45	6	7	6	135	14.7	5.5	1.14479e+07	3.15182e+07
Q15323	Keratin, type I cuticular Ha1 OS=Homo sapiens OX=9606 GN=KRT31 PE=1 SV=3	16	7	14	2	416	47.2	4.88	2.01379e+06	1.15135e+07
A0A7I2YQN2	Heterogeneous nuclear ribonucleoprotein Q OS=Homo sapiens OX=9606 GN=SYNCRIP PE=1 SV=1	9	5	5	5	561	62.5	7.56		2.50178e+07
O14950	Myosin regulatory light chain 12B OS=Homo sapiens OX=9606 GN=MYL12B PE=1 SV=2	30	5	10	5	172	19.8	4.84	1.47871e+07	6.51735e+07
A0A7I2V649	Polyadenylate-binding protein 1 OS=Homo sapiens OX=9606 GN=PABPC1 PE=1 SV=1	11	6	7	4	590	65.1	9.36	749237	2.13065e+07
P68366	Tubulin alpha-4A chain OS=Homo sapiens OX=9606 GN=TUBA4A PE=1 SV=1	10	4	5	2	448	49.9	5.06	5.60969e+06	2.48055e+07
Q15293	Reticulocalbin-1 OS=Homo sapiens OX=9606 GN=RCN1 PE=1 SV=1	13	4	5	4	331	38.9	5	4.66297e+06	1.89426e+07
H0Y449	Y-box-binding protein 1 (Fragment) OS=Homo sapiens OX=9606 GN=YBX1 PE=1 SV=1	13	3	3	3	374	42	10.43		3412102
A0A140TA69	Keratin, type I cuticular Ha4 OS=Homo sapiens OX=9606 GN=KRT34 PE=3 SV=1	12	5	7	1	436	49.4	5.06	1.08195e+06	1329471
B7Z1K5	Tubulin alpha chain OS=Homo sapiens OX=9606 PE=2 SV=1	7	3	5	1	519	57.7	5.07		1.71858e+06
Q0QEN7	ATP synthase subunit beta (Fragment) OS=Homo sapiens OX=9606 GN=ATP5B PE=2 SV=1	6	2	4	2	445	48.1	5.07		1.24062e+07
Q53HQ7	Elongation factor 1-alpha (Fragment) OS=Homo sapiens OX=9606 PE=2 SV=1	10	5	8	5	462	50.2	8.94	1.22353e+07	2.07195e+08
P30050	60S ribosomal protein L12 OS=Homo sapiens OX=9606 GN=RPL12 PE=1 SV=1	19	2	2	2	165	17.8	9.42	690143	1.13851e+06
Q6IQ30	Polyadenylate-binding protein OS=Homo sapiens OX=9606 GN=PABPC4 PE=2 SV=1	8	5	6	3	660	72.3	9.35		2.98108e+06
Q5D862	Filaggrin-2 OS=Homo sapiens OX=9606 GN=FLG2 PE=1 SV=1	2	4	7	4	2391	247.9	8.31	2.54393e+07	1.32462e+07
P31944	Caspase-14 OS=Homo sapiens OX=9606 GN=CASP14 PE=1 SV=2	17	4	7	4	242	27.7	5.58	1.93665e+07	1.43445e+07
H0YMD0	Annexin (Fragment) OS=Homo sapiens OX=9606 GN=ANXA2 PE=1 SV=1	17	4	5	4	227	25.3	5.97	1.28926e+07	7.04527e+06
P05109	Protein S100-A8 OS=Homo sapiens OX=9606 GN=S100A8 PE=1 SV=1	40	4	7	4	93	10.8	7.03	3.41646e+07	2.3918e+07
J3QTR3	Ubiquitin-40S ribosomal protein S27a (Fragment) OS=Homo sapiens OX=9606 GN=RPS27A PE=1 SV=1	32	3	5	3	106	12.2	10.14	1.69223e+07	4.69198e+07
A0A5C2G781	IGL c3567_light_IGKV1-39_IGKJ2 (Fragment) OS=Homo sapiens OX=9606 PE=2 SV=1	15	1	3	1	107	11.5	7.94	1.31773e+07	79018428
Q7Z3Y8	Keratin, type I cytoskeletal 27 OS=Homo sapiens OX=9606 GN=KRT27 PE=1 SV=2	8	4	12	2	459	49.8	5.05		6.45475e+06
P31151	Protein S100-A7 OS=Homo sapiens OX=9606 GN=S100A7 PE=1 SV=4	36	3	4	3	101	11.5	6.77	6.5881e+06	8.03304e+06
P25705	ATP synthase subunit alpha, mitochondrial OS=Homo sapiens OX=9606 GN=ATP5F1A PE=1 SV=1	7	4	6	4	553	59.7	9.13	3.13952e+06	6.54197e+07
I6L8B7	Fatty acid-binding protein 5 OS=Homo sapiens OX=9606 GN=FABP5 PE=1 SV=1	41	3	4	3	101	11.3	6.07	2.0503e+08	7.92998e+06
Q6KB66	Keratin, type II cytoskeletal 80 OS=Homo sapiens OX=9606 GN=KRT80 PE=1 SV=2	9	4	5	4	452	50.5	5.67	2.25301e+07	6.05936e+06
P25311	Zinc-alpha-2-glycoprotein OS=Homo sapiens OX=9606 GN=AZGP1 PE=1 SV=2	13	3	4	3	298	34.2	6.05	1.44528e+07	4.3184e+06
Q5T749	Keratinocyte proline-rich protein OS=Homo sapiens OX=9606 GN=KPRP PE=1 SV=1	7	3	4	3	579	64.1	8.27	1.78113e+07	3.83227e+06
P81605	Dermcidin OS=Homo sapiens OX=9606 GN=DCD PE=1 SV=2	30	4	6	4	110	11.3	6.54	1.46974e+08	6.89709e+07
P04040	Catalase OS=Homo sapiens OX=9606 GN=CAT PE=1 SV=3	7	3	3	3	527	59.7	7.39	1.81526e+06	1.4155e+06
Q5ZEY3	Glyceraldehyde-3-phosphate dehydrogenase (Fragment) OS=Homo sapiens OX=9606 GN=GAPD PE=2 SV=1	62	5	5	5	86	9.2	9.72	1.96366e+07	1.62007e+07
Q08188	Protein-glutamine gamma-glutamyltransferase E OS=Homo sapiens OX=9606 GN=TGM3 PE=1 SV=4	6	4	4	4	693	76.6	5.86	1.2687e+07	4.36744e+06
O43823	A-kinase anchor protein 8 OS=Homo sapiens OX=9606 GN=AKAP8 PE=1 SV=1	5	3	4	3	692	76.1	5.15	1.57183e+06	6.54586e+06
Q14525	Keratin, type I cuticular Ha3-II OS=Homo sapiens OX=9606 GN=KRT33B PE=1 SV=3	11	5	11	1	404	46.2	4.84		2.76518e+06
Q3SY84	Keratin, type II cytoskeletal 71 OS=Homo sapiens OX=9606 GN=KRT71 PE=1 SV=3	9	4	6	3	523	57.3	6.61	5.20312e+06	6.60366e+06
H0YAF8	Receptor of-activated protein C kinase 1 (Fragment) OS=Homo sapiens OX=9606 GN=RACK1 PE=1 SV=1	24	5	6	5	198	22	6.33	1.14502e+06	8.73624e+06
P12273	Prolactin-inducible protein OS=Homo sapiens OX=9606 GN=PIP PE=1 SV=1	21	3	4	3	146	16.6	8.05		4.03475e+06
P06702	Protein S100-A9 OS=Homo sapiens OX=9606 GN=S100A9 PE=1 SV=1	18	2	4	2	114	13.2	6.13	4.96379e+06	3.20072e+07
A0A5C2FYI2	IGL c1226_light_IGKV1-5_IGKJ1 (Fragment) OS=Homo sapiens OX=9606 PE=2 SV=1	15	1	3	1	107	11.8	7.94	7.6556e+06	2.2934e+06
Q16236	Nuclear factor erythroid 2-related factor 2 OS=Homo sapiens OX=9606 GN=NFE2L2 PE=1 SV=2	6	3	3	3	534	61	6.01		2.54605e+06
B5MDF5	GTP-binding nuclear protein Ran OS=Homo sapiens OX=9606 GN=RAN PE=1 SV=1	14	3	3	3	233	26.2	7.01	3.63418e+06	6.17293e+06
P06733	Alpha-enolase OS=Homo sapiens OX=9606 GN=ENO1 PE=1 SV=2	6	3	4	3	434	47.1	7.39	2.69794e+06	4742803
A8KAJ3	cDNA FLJ77823, highly similar to Homo sapiens EGF-containing fibulin-like extracellular matrix protein 1, transcript variant 3, mRNA OS=Homo sapiens OX=9606 PE=2 SV=1	6	3	3	3	493	54.6	5.14		2.85194e+06
P04792	Heat shock protein beta-1 OS=Homo sapiens OX=9606 GN=HSPB1 PE=1 SV=2	17	3	3	3	205	22.8	6.4	2.65114e+06	7914584
Q53GL5	IDP (Fragment) OS=Homo sapiens OX=9606 PE=2 SV=1	3	1	2	1	452	50.9	8.48		7.04081e+06
Q9H000	Probable E3 ubiquitin-protein ligase makorin-2 OS=Homo sapiens OX=9606 GN=MKRN2 PE=1 SV=2	9	4	5	4	416	46.9	7.61		1.04416e+07
A0A5C2GFX4	IGH + IGL c71_light_IGKV1-9_IGKJ2 (Fragment) OS=Homo sapiens OX=9606 PE=2 SV=1	15	1	2	1	107	11.6	7.12	1.75676e+07	4.75925e+07
Q6N096	Uncharacterized protein DKFZp686I15196 OS=Homo sapiens OX=9606 GN=DKFZp686I15196 PE=2 SV=1	9	4	16	4	466	50.9	8.06	3.7437e+09	4.58385e+09
A0A161I202	Lactotransferrin OS=Homo sapiens OX=9606 GN=LTF PE=2 SV=1	4	3	4	3	711	78.3	8.18	9.13008e+06	7.67422e+06
C9JZR2	Catenin delta-1 OS=Homo sapiens OX=9606 GN=CTNND1 PE=1 SV=2	2	2	5	2	938	104.8	6.87		4.23009e+06
P61204	ADP-ribosylation factor 3 OS=Homo sapiens OX=9606 GN=ARF3 PE=1 SV=2	14	2	2	2	181	20.6	7.43	718742	3.0758e+06
A0A2R3Z0D6	Hemoglobin subunit beta (Fragment) OS=Homo sapiens OX=9606 PE=3 SV=1	32	2	2	2	68	7.4	8.54	1.18071e+06	1.84231e+06
B4DNL5	Protein disulfide-isomerase OS=Homo sapiens OX=9606 PE=2 SV=1	7	3	3	3	492	55.3	4.79		4.30201e+06
Q05C31	ATPase_AAA_core domain-containing protein OS=Homo sapiens OX=9606 PE=2 SV=1	7	2	3	2	427	47.1	7.75	1.92984e+06	8.65715e+07
O75822	Eukaryotic translation initiation factor 3 subunit J OS=Homo sapiens OX=9606 GN=EIF3J PE=1 SV=2	9	2	2	2	258	29	4.83		3.33715e+06
A0A087WX60	Myopalladin OS=Homo sapiens OX=9606 GN=MYPN PE=1 SV=1	3	3	3	3	1026	112.6	7.12	1.87552e+06	3.58056e+06
B2R4P2	cDNA, FLJ92164, highly similar to Homo sapiens peroxiredoxin 1 (PRDX1), mRNA OS=Homo sapiens OX=9606 PE=2 SV=1	16	3	5	2	199	22.2	8.38	4.21694e+06	1.09248e+07
P48594	Serpin B4 OS=Homo sapiens OX=9606 GN=SERPINB4 PE=1 SV=2	7	3	4	3	390	44.8	6.21	4.83487e+06	8.77437e+06
H0Y8G5	Heterogeneous nuclear ribonucleoprotein D0 (Fragment) OS=Homo sapiens OX=9606 GN=HNRNPD PE=1 SV=8	9	2	2	1	260	29.6	9.16		2.06097e+06
B4DUI5	Triosephosphate isomerase OS=Homo sapiens OX=9606 PE=2 SV=1	15	3	4	3	213	22.9	6.92	1.28602e+06	3502783
H0YHA7	60S ribosomal protein L18 (Fragment) OS=Homo sapiens OX=9606 GN=RPL18 PE=1 SV=1	14	2	2	2	167	19	11.78	514488	3.77111e+06
B4DPU3	cDNA FLJ56548, highly similar to Elongation factor 2 OS=Homo sapiens OX=9606 PE=2 SV=1	4	2	3	2	566	62.8	6.1	4.60255e+06	10373134
P62269	40S ribosomal protein S18 OS=Homo sapiens OX=9606 GN=RPS18 PE=1 SV=3	13	2	2	2	152	17.7	10.99		711127
D3DTX7	Collagen, type I, alpha 1, isoform CRA_a OS=Homo sapiens OX=9606 GN=COL1A1 PE=4 SV=1	5	3	3	3	885	84.7	6.24	4.16198e+06	1.58278e+06
B0AZN7	cDNA, FLJ79477, highly similar to Protein-glutamine gamma-glutamyltransferase K OS=Homo sapiens OX=9606 PE=2 SV=1	4	3	4	3	817	89.7	6.04	2.45223e+06	520643
P04075	Fructose-bisphosphate aldolase A OS=Homo sapiens OX=9606 GN=ALDOA PE=1 SV=2	8	3	4	3	364	39.4	8.09	1.12278e+06	3.86235e+06
P60866	40S ribosomal protein S20 OS=Homo sapiens OX=9606 GN=RPS20 PE=1 SV=1	19	2	3	2	119	13.4	9.94	563501	3.24881e+06
P05089	Arginase-1 OS=Homo sapiens OX=9606 GN=ARG1 PE=1 SV=2	9	3	3	3	322	34.7	7.21	9.01369e+07	9.27189e+06
O75223	Gamma-glutamylcyclotransferase OS=Homo sapiens OX=9606 GN=GGCT PE=1 SV=1	16	3	3	3	188	21	5.14	3.66548e+06	3.16999e+06
A0A5C2G229	IGL c2506_light_IGKV1-33_IGKJ4 (Fragment) OS=Homo sapiens OX=9606 PE=2 SV=1	15	1	1	1	107	11.8	4.94		2.2934e+06
P62857	40S ribosomal protein S28 OS=Homo sapiens OX=9606 GN=RPS28 PE=1 SV=1	33	2	2	2	69	7.8	10.7		636712
C9JH19	Cathepsin D OS=Homo sapiens OX=9606 GN=CTSD PE=1 SV=2	6	3	5	3	451	48.6	7.84	1.63497e+07	8.30251e+06
A0A5C2G5L7	IGL c3870_light_IGKV1-33_IGKJ3 (Fragment) OS=Homo sapiens OX=9606 PE=2 SV=1	15	1	2	1	107	11.7	5.34		2141380
Q99729	Heterogeneous nuclear ribonucleoprotein A/B OS=Homo sapiens OX=9606 GN=HNRNPAB PE=1 SV=2	7	2	2	1	332	36.2	8.21	1.0935e+06	1.46078e+07
P30041	Peroxiredoxin-6 OS=Homo sapiens OX=9606 GN=PRDX6 PE=1 SV=3	13	3	3	3	224	25	6.38		2.56266e+06
H0YF32	40S ribosomal protein S3 (Fragment) OS=Homo sapiens OX=9606 GN=RPS3 PE=1 SV=1	17	2	2	2	123	13.5	8		1.16788e+07
Q9Y3I0	RNA-splicing ligase RtcB homolog OS=Homo sapiens OX=9606 GN=RTCB PE=1 SV=1	4	2	3	2	505	55.2	7.23	1.43988e+06	2.46989e+06
A0A0B4J259	1,4-beta-N-acetylmuramidase C OS=Homo sapiens OX=9606 GN=LYZ PE=1 SV=1	21	3	4	3	137	15.3	8.69	5.04913e+06	4.15006e+06
P31025	Lipocalin-1 OS=Homo sapiens OX=9606 GN=LCN1 PE=1 SV=1	13	2	3	2	176	19.2	5.58	5.03118e+07	6409994
B2RDW0	cDNA, FLJ96792, highly similar to Homo sapiens calmodulin 2 (phosphorylase kinase, delta) (CALM2), mRNA OS=Homo sapiens OX=9606 PE=2 SV=1	19	3	4	3	149	16.8	4.22	1.54375e+07	21242396
Q9UP60	SNC73 protein OS=Homo sapiens OX=9606 GN=SNC73 PE=2 SV=1	7	3	3	3	384	40.9	6.15	7.946e+06	6.54328e+06
B4DTA2	cDNA FLJ60148, highly similar to Homo sapiens heterogeneous nuclear ribonucleoprotein D-like (HNRPDL), transcript variant 2, mRNA OS=Homo sapiens OX=9606 PE=2 SV=1	7	2	2	1	271	30.2	8.72
A0A7I2YQB2	75 kDa glucose-regulated protein OS=Homo sapiens OX=9606 GN=HSPA9 PE=1 SV=1	5	3	3	2	577	63.1	5.72		3.27903e+06
P50914	60S ribosomal protein L14 OS=Homo sapiens OX=9606 GN=RPL14 PE=1 SV=4	11	2	2	2	215	23.4	10.93
A8K3X2	RISC-loading complex subunit TARBP2 OS=Homo sapiens OX=9606 GN=TARBP2 PE=2 SV=1	7	2	2	2	366	39	6.54		847619
A0A5C2G703	IGL c168_light_IGKV1-12_IGKJ5 (Fragment) OS=Homo sapiens OX=9606 PE=2 SV=1	15	1	1	1	107	11.5	8.91		768727
A0A5C2FYN0	IGL c367_light_IGLV1-44_IGLJ3 (Fragment) OS=Homo sapiens OX=9606 PE=2 SV=1	23	2	2	2	110	11.6	6		10085458
I0B0K8	Truncated profilaggrin OS=Homo sapiens OX=9606 GN=FLG PE=4 SV=1	0	2	3	2	4021	430.2	9.29	4.36694e+07	7.5419e+06
B4DF70	cDNA FLJ60461, highly similar to Peroxiredoxin-2 OS=Homo sapiens OX=9606 PE=2 SV=1	10	2	3	1	183	20.1	8.78		2033464
S6BGD6	IgG L chain OS=Homo sapiens OX=9606 PE=1 SV=1	11	2	2	2	235	24.8	7.24	7.68382e+06	1.55793e+07
P08865	40S ribosomal protein SA OS=Homo sapiens OX=9606 GN=RPSA PE=1 SV=4	8	2	2	2	295	32.8	4.87		4.08819e+06
Q13835	Plakophilin-1 OS=Homo sapiens OX=9606 GN=PKP1 PE=1 SV=2	3	2	2	2	747	82.8	9.13	1.30163e+06	1.31895e+06
D7RXV9	DING protein p38 OS=Homo sapiens OX=9606 PE=3 SV=1	6	2	2	2	364	36.9	8.12		694315
P62753	40S ribosomal protein S6 OS=Homo sapiens OX=9606 GN=RPS6 PE=1 SV=1	10	2	2	2	249	28.7	10.84		2.23019e+06
Q02878	60S ribosomal protein L6 OS=Homo sapiens OX=9606 GN=RPL6 PE=1 SV=3	8	2	4	2	288	32.7	10.58		1117133
Q6UN15	Pre-mRNA 3'-end-processing factor FIP1 OS=Homo sapiens OX=9606 GN=FIP1L1 PE=1 SV=1	2	1	1	1	594	66.5	5.59
P62820	Ras-related protein Rab-1A OS=Homo sapiens OX=9606 GN=RAB1A PE=1 SV=3	9	2	2	2	205	22.7	6.21		4.10004e+06
A0A5C2GBU8	IGH + IGL c218_heavy_IGHV4-59_IGHD6-6_IGHJ2 (Fragment) OS=Homo sapiens OX=9606 PE=2 SV=1	13	1	1	1	128	14.2	8.32
P26373	60S ribosomal protein L13 OS=Homo sapiens OX=9606 GN=RPL13 PE=1 SV=4	11	2	2	2	211	24.2	11.65		2877103
A0A5C2FX67	IGL c1571_light_IGKV1-5_IGKJ1 (Fragment) OS=Homo sapiens OX=9606 PE=2 SV=1	10	1	2	1	107	11.7	7.97	1.93855e+07	30187060
P22532	Small proline-rich protein 2D OS=Homo sapiens OX=9606 GN=SPRR2D PE=2 SV=2	31	2	3	2	72	7.9	8.37	8.99326e+06	7471129
P62805	Histone H4 OS=Homo sapiens OX=9606 GN=H4C1 PE=1 SV=2	10	1	4	1	103	11.4	11.36	1.20732e+07	5.06825e+06
P62241	40S ribosomal protein S8 OS=Homo sapiens OX=9606 GN=RPS8 PE=1 SV=2	6	1	1	1	208	24.2	10.32		1.00624e+06
A0A5C2G440	IGL c3320_light_IGKV1-5_IGKJ1 (Fragment) OS=Homo sapiens OX=9606 PE=2 SV=1	10	1	2	1	108	11.9	6.57	3.33558e+08	703268160
P39019	40S ribosomal protein S19 OS=Homo sapiens OX=9606 GN=RPS19 PE=1 SV=2	12	2	2	2	145	16.1	10.32	997721	4.29769e+06
Q5VVC8	60S ribosomal protein L11 OS=Homo sapiens OX=9606 GN=RPL11 PE=1 SV=2	14	2	2	2	167	19	9.8	332812	4.79501e+06
Q9UI42	Carboxypeptidase A4 OS=Homo sapiens OX=9606 GN=CPA4 PE=1 SV=2	3	1	2	1	421	47.3	6.7	1.0444e+06	714330
B4DLN1	cDNA FLJ60124, highly similar to Mitochondrial dicarboxylate carrier OS=Homo sapiens OX=9606 PE=2 SV=1	5	2	2	2	442	48.1	9.52		1.56206e+06
B4DM82	Peptidyl-prolyl cis-trans isomerase OS=Homo sapiens OX=9606 PE=2 SV=1	16	2	2	2	129	14.1	8.47		1.19556e+06
P84243	Histone H3.3 OS=Homo sapiens OX=9606 GN=H3-3A PE=1 SV=2	8	2	3	2	136	15.3	11.27	5.36723e+06	5.93695e+06
A8K4W0	40S ribosomal protein S3a OS=Homo sapiens OX=9606 GN=RPS3A PE=2 SV=1	6	2	2	2	264	29.9	9.73
A0A5C2GCB7	IGH + IGL c104_light_IGKV1-5_IGKJ2 (Fragment) OS=Homo sapiens OX=9606 PE=2 SV=1	10	1	2	1	106	11.6	7.94	7.62974e+06	6.43729e+06
C9JEL3	Eukaryotic translation initiation factor 4E type 2 (Fragment) OS=Homo sapiens OX=9606 GN=EIF4E2 PE=1 SV=1	8	1	1	1	213	24.6	7.53
Q9HB00	Desmocollin 1, isoform CRA_b OS=Homo sapiens OX=9606 GN=DSC1 PE=4 SV=1	3	2	3	2	840	93.8	5.53	2.67319e+06	1.0735e+06
B7Z8S9	mRNA (guanine-N(7)-)-methyltransferase OS=Homo sapiens OX=9606 PE=2 SV=1	9	1	1	1	129	15	7.85		1.49321e+06
P22061	Protein-L-isoaspartate(D-aspartate) O-methyltransferase OS=Homo sapiens OX=9606 GN=PCMT1 PE=1 SV=4	10	2	2	2	227	24.6	7.21		6.43432e+06
C9J0E4	Cystatin-A OS=Homo sapiens OX=9606 GN=CSTA PE=1 SV=1	19	1	2	1	63	7.1	7.24	7.42017e+06	6.03108e+06
A0A5C2GNC4	IG c742_light_IGKV1-5_IGKJ1 (Fragment) OS=Homo sapiens OX=9606 PE=2 SV=1	11	1	3	1	103	11.4	8	2.5496e+07	25717460
P10599	Thioredoxin OS=Homo sapiens OX=9606 GN=TXN PE=1 SV=3	12	1	2	1	105	11.7	4.92	1.14379e+06	4.45535e+06
B4DN72	cDNA FLJ55910, highly similar to Keratin, type II cuticular Hb6 OS=Homo sapiens OX=9606 PE=2 SV=1	4	2	2	2	486	53.5	5.66		1.16364e+06
P36578	60S ribosomal protein L4 OS=Homo sapiens OX=9606 GN=RPL4 PE=1 SV=5	3	1	2	1	427	47.7	11.06	2.29809e+06	2226092
A0A5C2GE82	IGH + IGL c430_light_IGKV1-33_IGKJ2 (Fragment) OS=Homo sapiens OX=9606 PE=2 SV=1	15	2	4	2	108	11.8	5.96	4.41718e+07	1.40979e+08
A0A5C2FV63	IGL c662_light_IGLV3-21_IGLJ2 (Fragment) OS=Homo sapiens OX=9606 PE=2 SV=1	10	1	2	1	106	11.3	6.51		13411009
Q9BY74	60S ribosomal protein L7a (Fragment) OS=Homo sapiens OX=9606 GN=RP-L7a PE=2 SV=1	9	1	1	1	142	15.6	10.04		1.50985e+06
H3BQ34	Pyruvate kinase OS=Homo sapiens OX=9606 GN=PKM PE=1 SV=1	5	1	1	1	281	30.7	6.95	540560	2.21798e+06
A0A7P0TAE1	Endoplasmin OS=Homo sapiens OX=9606 GN=HSP90B1 PE=1 SV=1	2	1	1	1	789	90.7	5.24		2.41624e+06
A0A5C2G8J2	IGL c3955_light_IGLV1-47_IGLJ3 (Fragment) OS=Homo sapiens OX=9606 PE=2 SV=1	13	1	2	1	110	11.6	8.97	5.08186e+06	1.8251e+06
A0A024R326	60S ribosomal protein L29 OS=Homo sapiens OX=9606 GN=RPL29 PE=1 SV=1	10	1	1	1	157	17.5	11.66		802769
B4DRW1	cDNA FLJ55805, highly similar to Keratin, type II cytoskeletal 4 OS=Homo sapiens OX=9606 PE=2 SV=1	4	2	3	1	474	51.7	6.81
G9K389	YWHAE/FAM22B fusion protein (Fragment) OS=Homo sapiens OX=9606 GN=YWHAE/FAM22B fusion PE=2 SV=1	5	2	3	2	384	41.3	4.97	1.54041e+06	13734877
A0A384ME17	Elongation factor Tu OS=Homo sapiens OX=9606 GN=TUFM PE=1 SV=1	4	2	2	2	455	49.8	7.61	296009	2.14645e+06
A8K0T9	F-actin-capping protein subunit alpha OS=Homo sapiens OX=9606 PE=2 SV=1	6	2	2	2	286	32.9	5.69
A0A087WYT3	Prostaglandin E synthase 3 OS=Homo sapiens OX=9606 GN=PTGES3 PE=1 SV=1	8	1	1	1	164	19.1	4.55		1.292e+06
P59665	Neutrophil defensin 1 OS=Homo sapiens OX=9606 GN=DEFA1 PE=1 SV=1	19	2	3	2	94	10.2	6.99	6.92408e+06	4590767
Q96DV4	39S ribosomal protein L38, mitochondrial OS=Homo sapiens OX=9606 GN=MRPL38 PE=1 SV=2	3	1	1	1	380	44.6	7.53		1.58825e+06
K7EMH1	60S ribosomal protein L22 (Fragment) OS=Homo sapiens OX=9606 GN=RPL22 PE=1 SV=1	15	1	1	1	89	10.4	9.66		2251862
B4DDI8	cDNA FLJ53704, moderately similar to Nascent polypeptide-associated complex subunit alpha OS=Homo sapiens OX=9606 PE=2 SV=1	8	1	1	1	169	18.3	3.92		807423
P05164	Myeloperoxidase OS=Homo sapiens OX=9606 GN=MPO PE=1 SV=1	1	1	1	1	745	83.8	8.97
A0A7P0T847	A-kinase anchor protein 8-like OS=Homo sapiens OX=9606 GN=AKAP8L PE=1 SV=1	3	1	1	1	395	43	4.87		2.42555e+06
P29692	Elongation factor 1-delta OS=Homo sapiens OX=9606 GN=EEF1D PE=1 SV=5	4	1	1	1	281	31.1	5.01		455040
B4DFF9	cDNA FLJ60469, highly similar to COP9 signalosome complex subunit 8 OS=Homo sapiens OX=9606 PE=2 SV=1	13	1	1	1	115	12.9	6.52
O14556	Glyceraldehyde-3-phosphate dehydrogenase, testis-specific OS=Homo sapiens OX=9606 GN=GAPDHS PE=1 SV=2	3	1	2	1	408	44.5	8.19	9.06596e+06	9903423
Q5BKZ1	DBIRD complex subunit ZNF326 OS=Homo sapiens OX=9606 GN=ZNF326 PE=1 SV=2	2	1	1	1	582	65.6	5.15		765791
F5GXG4	Serine/threonine-protein phosphatase PGAM5, mitochondrial OS=Homo sapiens OX=9606 GN=PGAM5 PE=1 SV=1	7	1	1	1	140	15.9	7.02		1.12624e+06
P39023	60S ribosomal protein L3 OS=Homo sapiens OX=9606 GN=RPL3 PE=1 SV=2	3	1	1	1	403	46.1	10.18	9.70519e+06	47946192
A0A5C2GI75	IG c217_light_IGKV3-15_IGKJ4 (Fragment) OS=Homo sapiens OX=9606 PE=2 SV=1	15	2	4	2	110	11.7	8.47	8.79395e+07	319360511
Q96DR8	Mucin-like protein 1 OS=Homo sapiens OX=9606 GN=MUCL1 PE=1 SV=1	19	2	2	2	90	9	4.64	2.18411e+06	4.92918e+06
A2J1N8	Rheumatoid factor RF-ET11 (Fragment) OS=Homo sapiens OX=9606 PE=2 SV=1	15	1	1	1	95	10.2	9.33	1.67669e+06	75731464
Q1RMG2	Adenosylhomocysteinase OS=Homo sapiens OX=9606 GN=AHCY PE=2 SV=1	3	1	1	1	306	33.8	6.61		6.44736e+06
A0A7I2V2S0	RNA helicase OS=Homo sapiens OX=9606 GN=DDX5 PE=1 SV=1	3	1	1	1	416	47.2	8.47		1.14185e+06
A0A5C2G6R1	IGH c272_heavy__IGHV5-51_IGHD2-15_IGHJ3 (Fragment) OS=Homo sapiens OX=9606 PE=2 SV=1	10	1	1	1	127	14.3	7.78		3.24916e+06
A0A1U9X8X5	Corneodesmosin OS=Homo sapiens OX=9606 PE=4 SV=1	3	1	2	1	528	51.5	8.35	1.86382e+06	1.03637e+06
H3BQZ7	HCG2044799 OS=Homo sapiens OX=9606 GN=HNRNPUL2-BSCL2 PE=4 SV=1	1	1	1	1	746	84.6	4.93		913040
P62491	Ras-related protein Rab-11A OS=Homo sapiens OX=9606 GN=RAB11A PE=1 SV=3	5	1	1	1	216	24.4	6.57		2.15568e+06
A0A5C2FTR7	IGL c229_light_IGKV1-12_IGKJ3 (Fragment) OS=Homo sapiens OX=9606 PE=2 SV=1	15	1	1	1	108	11.6	8.91		22477530
P28838	Cytosol aminopeptidase OS=Homo sapiens OX=9606 GN=LAP3 PE=1 SV=3	2	1	1	1	519	56.1	7.93		1.85468e+06
P62318	Small nuclear ribonucleoprotein Sm D3 OS=Homo sapiens OX=9606 GN=SNRPD3 PE=1 SV=1	8	1	1	1	126	13.9	10.32
P47929	Galectin-7 OS=Homo sapiens OX=9606 GN=LGALS7 PE=1 SV=2	10	1	1	1	136	15.1	7.62
A8K6T3	cDNA FLJ78674, highly similar to Homo sapiens desmocollin type 4 OS=Homo sapiens OX=9606 PE=2 SV=1	1	1	1	1	896	99.9	6.15	1.10912e+06	1.85043e+06
A0A5C2GTI8	IG c784_light_IGKV1D-13_IGKJ4 (Fragment) OS=Homo sapiens OX=9606 PE=2 SV=1	15	1	1	1	107	11.5	6.54
Q712K3	Ubiquitin-conjugating enzyme E2 R2 OS=Homo sapiens OX=9606 GN=UBE2R2 PE=1 SV=1	5	1	1	1	238	27.1	4.42		848123
E5RH77	40S ribosomal protein S14 OS=Homo sapiens OX=9606 GN=RPS14 PE=1 SV=1	8	1	2	1	134	14.3	9.52	1.26358e+06	9495481
Q01105	Protein SET OS=Homo sapiens OX=9606 GN=SET PE=1 SV=3	4	1	1	1	290	33.5	4.32	796809	5.38324e+06
Q96FJ2	Dynein light chain 2, cytoplasmic OS=Homo sapiens OX=9606 GN=DYNLL2 PE=1 SV=1	12	1	1	1	89	10.3	7.37
B4DNH2	cDNA FLJ58596, highly similar to Eukaryotic initiation factor 4A-I OS=Homo sapiens OX=9606 PE=2 SV=1	4	1	1	1	229	26.8	5.43
Q53S24	Prothymosin, alpha OS=Homo sapiens OX=9606 GN=PTMAP7 PE=2 SV=1	9	1	1	1	110	12.1	3.79	4.64984e+06
P62316	Small nuclear ribonucleoprotein Sm D2 OS=Homo sapiens OX=9606 GN=SNRPD2 PE=1 SV=1	8	1	1	1	118	13.5	9.91		1118212
A0A1W2PP74	Glycine dehydrogenase (aminomethyl-transferring) OS=Homo sapiens OX=9606 GN=GLDC PE=1 SV=1	5	1	1	1	420	46.2	7.59		726327
E5RI99	60S ribosomal protein L30 (Fragment) OS=Homo sapiens OX=9606 GN=RPL30 PE=1 SV=1	11	1	1	1	114	12.6	9.55		1243074
Q6FG99	RPLP1 protein OS=Homo sapiens OX=9606 GN=RPLP1 PE=2 SV=1	14	1	1	1	114	11.6	4.37
Q16777	Histone H2A type 2-C OS=Homo sapiens OX=9606 GN=H2AC20 PE=1 SV=4	7	1	2	1	129	14	10.9	4.22727e+06	6.48282e+06
A0A5C2GM18	IG c1021_light_IGKV1-5_IGKJ3 (Fragment) OS=Homo sapiens OX=9606 PE=2 SV=1	11	1	2	1	104	11.4	8.46	1.72929e+06	6373170
P15531	Nucleoside diphosphate kinase A OS=Homo sapiens OX=9606 GN=NME1 PE=1 SV=1	8	1	1	1	152	17.1	6.19		1.63249e+06
P80723	Brain acid soluble protein 1 OS=Homo sapiens OX=9606 GN=BASP1 PE=1 SV=2	6	1	1	1	227	22.7	4.63	2.34183e+06
A0A7I2YQG2	Ribosomal protein L19 OS=Homo sapiens OX=9606 GN=RPL19 PE=1 SV=1	4	1	2	1	216	25.7	11.27	3.03502e+06	2387620
A0A5C2G3J8	IGL c3494_light_IGKV1-5_IGKJ1 (Fragment) OS=Homo sapiens OX=9606 PE=2 SV=1	10	1	1	1	107	11.7	8.29		1.74329e+06
A0A5C2GAB1	IGH + IGL c25_light_IGLV3-1_IGLJ2 (Fragment) OS=Homo sapiens OX=9606 PE=2 SV=1	9	1	1	1	106	11.6	5.34		26373798
Q9HCY8	Protein S100-A14 OS=Homo sapiens OX=9606 GN=S100A14 PE=1 SV=1	11	1	1	1	104	11.7	5.24	1.40962e+06	1.25896e+06
A0A5C2H014	IG c1278_light_IGKV1-5_IGKJ1 (Fragment) OS=Homo sapiens OX=9606 PE=2 SV=1	10	1	2	1	106	11.7	8.48	6.34181e+06	9017364
B4DTV0	cDNA FLJ57801, highly similar to Homo sapiens AHNAK nucleoprotein (desmoyokin) (AHNAK), transcript variant 1, mRNA (Fragment) OS=Homo sapiens OX=9606 PE=2 SV=1	2	1	1	1	1079	114.1	6.43	749837	644687
A0A5C2GL51	IG c1109_light_IGKV1-5_IGKJ2 (Fragment) OS=Homo sapiens OX=9606 PE=2 SV=1	10	1	1	1	105	11.5	8.84	4.10554e+06	12742241
P31153	S-adenosylmethionine synthase isoform type-2 OS=Homo sapiens OX=9606 GN=MAT2A PE=1 SV=1	2	1	1	1	395	43.6	6.48		2.64253e+06
A0A679KTH4	Beta-galactosidase (Fragment) OS=Homo sapiens OX=9606 GN=EmGFP-LacZ-E2F-TdTom PE=3 SV=1	1	1	1	1	1279	145.4	5.81
A0A0A0MT01	Actin-depolymerizing factor OS=Homo sapiens OX=9606 GN=GSN PE=1 SV=1	1	1	1	1	767	84.7	5.83	847413	2439903
D3DP13	Fibrinogen beta chain OS=Homo sapiens OX=9606 GN=FGB PE=4 SV=1	3	1	1	1	344	39.7	7.3	694374
P00450	Ceruloplasmin OS=Homo sapiens OX=9606 GN=CP PE=1 SV=1	1	1	1	1	1065	122.1	5.72		1.67987e+06
E9PKZ0	60S ribosomal protein L8 (Fragment) OS=Homo sapiens OX=9606 GN=RPL8 PE=1 SV=1	5	1	2	1	205	22.4	10.76	1.4455e+06	1.91114e+06
A0A804HLD4	Histone-lysine N-methyltransferase 2C (Fragment) OS=Homo sapiens OX=9606 GN=KMT2C PE=4 SV=1	0	1	1	1	1793	199	8.38		3.61858e+06
A0A2R8Y6J3	60S ribosomal protein L5 (Fragment) OS=Homo sapiens OX=9606 GN=RPL5 PE=1 SV=1	6	1	1	1	238	27	9.13
A0A5C2H271	IG c1046_light_IGKV1-5_IGKJ3 (Fragment) OS=Homo sapiens OX=9606 PE=2 SV=1	15	1	1	1	107	11.6	8.85	1.2227e+06	5879372
Q15365	Poly(rC)-binding protein 1 OS=Homo sapiens OX=9606 GN=PCBP1 PE=1 SV=2	4	1	1	1	356	37.5	7.09		973850
A0A5C2FYN4	IGL c1340_light_IGKV1-17_IGKJ1 (Fragment) OS=Homo sapiens OX=9606 PE=2 SV=1	14	1	1	1	107	11.7	8.85		1.26186e+06
A0A5C2G5D4	IGL c1533_light_IGLV3-25_IGLJ3 (Fragment) OS=Homo sapiens OX=9606 PE=2 SV=1	10	1	1	1	108	11.3	5.01	1.9583e+06	16658458
A0A5C2GWP1	IG c849_light_IGKV1-5_IGKJ1 (Fragment) OS=Homo sapiens OX=9606 PE=2 SV=1	7	1	1	1	107	11.9	8.91		806938
H0YBT1	BAG family molecular chaperone regulator 4 (Fragment) OS=Homo sapiens OX=9606 GN=BAG4 PE=1 SV=1	7	1	1	1	155	16.5	5.94
K7EL20	Eukaryotic translation initiation factor 3 subunit G (Fragment) OS=Homo sapiens OX=9606 GN=EIF3G PE=1 SV=8	3	1	1	1	262	29.3	5.41
P49207	60S ribosomal protein L34 OS=Homo sapiens OX=9606 GN=RPL34 PE=1 SV=3	8	1	1	1	117	13.3	11.47		575157
P80297	Metallothionein-1X OS=Homo sapiens OX=9606 GN=MT1X PE=1 SV=1	13	1	2	1	61	6.1	7.96	1.49168e+06	816863
I3L303	40S ribosomal protein S15a OS=Homo sapiens OX=9606 GN=RPS15A PE=1 SV=1	17	1	1	1	52	6	11	140247	1.39506e+06
A0A7I2V562	Cytospin-B OS=Homo sapiens OX=9606 GN=SPECC1 PE=1 SV=1	1	1	2	1	834	92.5	5.83	7.81401e+08	195132928
K7ELC7	60S ribosomal protein L27 (Fragment) OS=Homo sapiens OX=9606 GN=RPL27 PE=1 SV=1	6	1	1	1	144	16.5	10.58		1142510
B4DQI7	cDNA FLJ58042, highly similar to Protein NipSnap1 OS=Homo sapiens OX=9606 PE=2 SV=1	3	1	1	1	264	31.4	9.22
A0A5C2G324	IGL c3314_light_IGKV3-11_IGKJ2 (Fragment) OS=Homo sapiens OX=9606 PE=2 SV=1	7	1	2	1	108	11.9	8.88	8.45238e+07	506956480
Q4ZG77	26S proteasome regulatory subunit RPN11 (Fragment) OS=Homo sapiens OX=9606 GN=PSMD14 PE=4 SV=1	8	1	1	1	154	16.5	5.24		543234
A0A5C2GKE9	IGH + IGL c507_light_IGKV1-5_IGKJ1 (Fragment) OS=Homo sapiens OX=9606 PE=2 SV=1	10	1	1	1	106	11.5	8.47	4.10554e+06	12742241
Q5VTI5	Pleckstrin homology domain-containing family A member 6 OS=Homo sapiens OX=9606 GN=PLEKHA6 PE=1 SV=1	1	1	1	1	1068	119.2	8.92	7.10643e+06	2.13718e+06
A0A5C2GZW5	IG c256_light_IGKV4-1_IGKJ1 (Fragment) OS=Homo sapiens OX=9606 PE=2 SV=1	8	1	1	1	113	12.4	7.97		20734514
B2RE74	Fructose-bisphosphatase OS=Homo sapiens OX=9606 PE=2 SV=1	3	1	1	1	338	36.8	6.68		684202
A0A0C4DGN4	Zymogen granule protein 16 homolog B OS=Homo sapiens OX=9606 GN=ZG16B PE=1 SV=1	5	1	2	1	178	19.6	5.95
A0A2R8Y738	Ribosomal protein L15 (Fragment) OS=Homo sapiens OX=9606 GN=RPL15 PE=1 SV=1	7	1	1	1	138	16.3	10.87	849148	3.73193e+06
B7Z1M6	cDNA FLJ57716, highly similar to 40S ribosomal protein S4, X isoform OS=Homo sapiens OX=9606 PE=2 SV=1	7	1	1	1	132	15	10.13
A0A5C2GTP9	IG c864_light_IGKV1D-13_IGKJ1 (Fragment) OS=Homo sapiens OX=9606 PE=2 SV=1	15	1	1	1	107	11.5	8.47		3.49915e+06
P23490	Loricrin OS=Homo sapiens OX=9606 GN=LORICRIN PE=1 SV=2	3	1	2	1	312	25.7	8.09	4.64766e+06	3.16973e+06
Q9BTL3	RNA guanine-N7 methyltransferase activating subunit OS=Homo sapiens OX=9606 GN=RAMAC PE=1 SV=1	7	1	1	1	118	14.4	8.94		1.35253e+06
Q96QA5	Gasdermin-A OS=Homo sapiens OX=9606 GN=GSDMA PE=1 SV=4	2	1	1	1	445	49.3	5.29	5.02254e+06	1.92971e+06
Q16778	Histone H2B type 2-E OS=Homo sapiens OX=9606 GN=H2BC21 PE=1 SV=3	7	1	1	1	126	13.9	10.32	4.73767e+06	2.56098e+06
A0A5C2G1P1	IGL c1387_light_IGKV4-1_IGKJ4 (Fragment) OS=Homo sapiens OX=9606 PE=2 SV=1	14	1	1	1	111	12.2	7.12		2.76482e+06
A0A890VXV0	Light chain variable region (Fragment) OS=Homo sapiens OX=9606 PE=2 SV=1	6	1	4	1	114	12.4	5.96	5.01328e+07	237743688
A0A5C2G2N0	IGL c2850_light_IGLV2-11_IGLJ1 (Fragment) OS=Homo sapiens OX=9606 PE=2 SV=1	7	1	2	1	110	11.6	7.06		9254219
Q1ZYL5	Tropomyosin 1 alpha variant 6 OS=Homo sapiens OX=9606 PE=2 SV=1	4	1	1	1	245	28.5	4.78		911726
B4DNG4	cDNA FLJ59137, highly similar to RNA-binding protein 14 OS=Homo sapiens OX=9606 PE=2 SV=1	4	1	1	1	213	22.7	9.74
A0A5C2GIK7	IG c117_light_IGLV4-60_IGLJ2 (Fragment) OS=Homo sapiens OX=9606 PE=2 SV=1	9	1	2	1	113	12	7.37	5.25792e+06	143623088
A0A5C2GXD6	IG c1623_light_IGKV4-1_IGKJ1 (Fragment) OS=Homo sapiens OX=9606 PE=2 SV=1	8	1	1	1	113	12.5	5.36
A0A5C2G3L2	IGL c3752_light_IGKV4-1_IGKJ1 (Fragment) OS=Homo sapiens OX=9606 PE=2 SV=1	7	1	1	1	113	12.5	7.12	482966	27950846
J3KTD3	60S ribosomal protein L36 (Fragment) OS=Homo sapiens OX=9606 GN=RPL36 PE=1 SV=1	13	1	1	1	68	7.6	10.49		580213
C9J7B1	Protein NipSnap homolog 2 (Fragment) OS=Homo sapiens OX=9606 GN=NIPSNAP2 PE=1 SV=1	14	1	1	1	65	7.9	9.6		917031
B5MCT8	40S ribosomal protein S9 OS=Homo sapiens OX=9606 GN=RPS9 PE=1 SV=1	6	1	1	1	139	16.6	11.06		1.29758e+06
A0A5C2G3C6	IGL c3778_light_IGLV1-40_IGLJ1 (Fragment) OS=Homo sapiens OX=9606 PE=2 SV=1	8	1	1	1	113	11.7	7.97		1.35703e+06
A0A0J9YYH3	Glucose-6-phosphate isomerase (Fragment) OS=Homo sapiens OX=9606 GN=GPI PE=1 SV=1	4	1	1	1	283	32	9.63
A0A5C2G0Q9	IGL c2831_light_IGKV1D-39_IGKJ4 (Fragment) OS=Homo sapiens OX=9606 PE=2 SV=1	7	1	1	1	107	11.6	9.13		43920052
Q96EL3	39S ribosomal protein L53, mitochondrial OS=Homo sapiens OX=9606 GN=MRPL53 PE=1 SV=1	9	1	1	1	112	12.1	8.76		654674
J3QRW1	26S proteasome regulatory subunit 8 (Fragment) OS=Homo sapiens OX=9606 GN=PSMC5 PE=1 SV=1	8	1	1	1	143	15.8	6.09		3.02689e+06
A0A7S5C3Z4	IGH c2930_heavy_IGHV3-49_IGHD2-15_IGHJ4 (Fragment) OS=Homo sapiens OX=9606 PE=2 SV=1	17	1	1	1	129	14	7.72	250098	2.75253e+06
A0A5C2GI22	IG c127_light_IGKV3-15_IGKJ2 (Fragment) OS=Homo sapiens OX=9606 PE=2 SV=1	7	1	4	1	107	11.7	8.48	1.38818e+07	1.10181e+08
A0A5C2G316	IGL c2990_light_IGLV2-8_IGLJ3 (Fragment) OS=Homo sapiens OX=9606 PE=2 SV=1	7	1	1	1	112	11.9	6.54		3.03718e+06
A0A7I2V4F0	ATP-dependent RNA helicase DDX1 OS=Homo sapiens OX=9606 GN=DDX1 PE=1 SV=1	1	1	1	1	734	81.7	7.33		690033
A0A5C2GK38	IG c426_light_IGKV1-27_IGKJ4 (Fragment) OS=Homo sapiens OX=9606 PE=2 SV=1	15	1	1	1	107	11.2	8.46		2861515
Q96P63	Serpin B12 OS=Homo sapiens OX=9606 GN=SERPINB12 PE=1 SV=1	2	1	1	1	405	46.2	5.53		1.87788e+06
Q14210	Lymphocyte antigen 6D OS=Homo sapiens OX=9606 GN=LY6D PE=1 SV=1	8	1	1	1	128	13.3	8.21		544405
H3BND3	Cleavage and polyadenylation specificity factor subunit 5 (Fragment) OS=Homo sapiens OX=9606 GN=NUDT21 PE=1 SV=8	5	1	1	1	149	17.1	6.38		1.57337e+06
M0QX76	40S ribosomal protein S16 (Fragment) OS=Homo sapiens OX=9606 GN=RPS16 PE=1 SV=1	14	1	1	1	50	5.6	9.63		1.33702e+06
A8K6C9	Insulin-like growth factor II OS=Homo sapiens OX=9606 PE=2 SV=1	5	1	1	1	180	20.2	9.32		1.06523e+06
A0A7S5EWJ4	IGH c2162_heavy_IGHV4-34_IGHD3-10_IGHJ4 (Fragment) OS=Homo sapiens OX=9606 PE=2 SV=1	12	1	1	1	121	13.4	9.41		590351
P51991	Heterogeneous nuclear ribonucleoprotein A3 OS=Homo sapiens OX=9606 GN=HNRNPA3 PE=1 SV=2	3	1	1	1	378	39.6	9.01
S4R369	39S ribosomal protein L37, mitochondrial OS=Homo sapiens OX=9606 GN=MRPL37 PE=1 SV=1	2	1	1	1	483	54.9	9.42		2706958
B4DXS4	IDP OS=Homo sapiens OX=9606 PE=2 SV=1	6	1	1	1	235	26.7	6.7
A0A5C2G610	IGL c1823_light_IGKV3-11_IGKJ5 (Fragment) OS=Homo sapiens OX=9606 PE=2 SV=1	7	1	1	1	107	11.6	7.99	454458	2.12549e+06
Q5T750	Skin-specific protein 32 OS=Homo sapiens OX=9606 GN=XP32 PE=1 SV=1	3	1	1	1	250	26.2	7.97	1.30524e+07	20158804
A0A5C2G7B4	IGL c308_light_IGLV2-14_IGLJ2 (Fragment) OS=Homo sapiens OX=9606 PE=2 SV=1	7	1	1	1	111	11.6	7.96	917286	5.02538e+06
Q59GH2	NY-REN-8 antigen variant (Fragment) OS=Homo sapiens OX=9606 PE=2 SV=1	3	1	2	1	209	21.7	11.88	4.41455e+07	197127216
P62877	E3 ubiquitin-protein ligase RBX1 OS=Homo sapiens OX=9606 GN=RBX1 PE=1 SV=1	7	1	1	1	108	12.3	6.96	1.41927e+06	1.49657e+06
P62277	40S ribosomal protein S13 OS=Homo sapiens OX=9606 GN=RPS13 PE=1 SV=2	8	1	1	1	151	17.2	10.54
A0A5C2GP33	IG c988_heavy_IGHV4-34_IGHD1-7_IGHJ5 (Fragment) OS=Homo sapiens OX=9606 PE=2 SV=1	13	1	1	1	126	13.7	8.68		1.35094e+06
P03973	Antileukoproteinase OS=Homo sapiens OX=9606 GN=SLPI PE=1 SV=2	9	1	1	1	132	14.3	8.75
B2R5H0	Protein S100 OS=Homo sapiens OX=9606 PE=2 SV=1	9	1	1	1	105	11.7	7.18	348865
B4DN87	Collagen-binding protein OS=Homo sapiens OX=9606 PE=2 SV=1	2	1	1	1	397	44.2	8.95	377634	613104
A0A5C2G1H3	IGL c1317_light_IGKV1-5_IGKJ1 (Fragment) OS=Homo sapiens OX=9606 PE=2 SV=1	10	1	1	1	107	12	8.91	1.20076e+06	10445068
H7BY55	Complement decay-accelerating factor OS=Homo sapiens OX=9606 GN=CD55 PE=1 SV=2	1	1	1	1	550	58.9	8.78
A0A1W2PP06	BK channel (Fragment) OS=Homo sapiens OX=9606 GN=KCNMA1 PE=1 SV=1	1	1	1	1	1223	137	7.11		729120
A0A5C2GIY1	IGH + IGL c17_light_IGLV3-21_IGLJ3 (Fragment) OS=Homo sapiens OX=9606 PE=2 SV=1	7	1	1	1	108	11.6	4.67	5.6843e+06	3.23536e+06
A0A5C2GEF2	IGH + IGL c500_light_IGKV3-20_IGKJ1 (Fragment) OS=Homo sapiens OX=9606 PE=2 SV=1	7	1	1	1	108	11.7	9.1		729406
Q14427	GM2-activator protein (Fragment) OS=Homo sapiens OX=9606 PE=2 SV=1	8	1	1	1	103	11.1	4.75	413410	656569
P62829	60S ribosomal protein L23 OS=Homo sapiens OX=9606 GN=RPL23 PE=1 SV=1	7	1	1	1	140	14.9	10.51		1.48172e+06
P0C874	Spermatogenesis-associated protein 31D3 OS=Homo sapiens OX=9606 GN=SPATA31D3 PE=2 SV=1	1	1	1	1	917	102.4	8.07	2.71234e+06	1.56125e+06
Q15828	Cystatin-M OS=Homo sapiens OX=9606 GN=CST6 PE=1 SV=1	7	1	1	1	149	16.5	8.09	1.18647e+06
P43686	26S proteasome regulatory subunit 6B OS=Homo sapiens OX=9606 GN=PSMC4 PE=1 SV=2	2	1	1	1	418	47.3	5.21	3.15587e+06	1665653
C9JXA7	Late endosomal/lysosomal adaptor and MAPK and MTOR activator 4 OS=Homo sapiens OX=9606 GN=LAMTOR4 PE=1 SV=1	7	1	1	1	137	14.3	7.36	2.6511e+07	136133120
A0A5C2GBK0	IGH + IGL c582_light_IGKV3-15_IGKJ3 (Fragment) OS=Homo sapiens OX=9606 PE=2 SV=1	8	1	1	1	107	11.4	4.94		4031814
P13667	Protein disulfide-isomerase A4 OS=Homo sapiens OX=9606 GN=PDIA4 PE=1 SV=2	1	1	1	1	645	72.9	5.07		1944850
P37108	Signal recognition particle 14 kDa protein OS=Homo sapiens OX=9606 GN=SRP14 PE=1 SV=2	6	1	1	1	136	14.6	10.04	1.896e+06	1.27974e+06
A0A5C2GAN3	IGH + IGL c316_heavy_IGHV4-34_IGHD5-18_IGHJ4 (Fragment) OS=Homo sapiens OX=9606 PE=2 SV=1	12	1	1	1	121	13.3	8	2.25361e+06
A0A5C2GT69	IG c655_light_IGKV3-20_IGKJ3 (Fragment) OS=Homo sapiens OX=9606 PE=2 SV=1	15	1	1	1	108	11.7	7.96		1536083
A0A5C2FTW2	IGL c152_light_IGKV1D-13_IGKJ5 (Fragment) OS=Homo sapiens OX=9606 PE=2 SV=1	15	1	1	1	107	11.4	7.96	1.6411e+07	32009046
C9JUP7	15S Mg(2+)-ATPase p97 subunit OS=Homo sapiens OX=9606 GN=VCP PE=1 SV=2	1	1	1	1	761	84.5	5.27		2.5915e+06
A0A5C2FZB6	IGL c1506_light_IGKV1-5_IGKJ1 (Fragment) OS=Homo sapiens OX=9606 PE=2 SV=1	10	1	1	1	108	12	5.29	9.93212e+06	28565344
A0A5C2FX73	IGL c195_light_IGLV1-40_IGLJ2 (Fragment) OS=Homo sapiens OX=9606 PE=2 SV=1	6	1	2	1	112	11.8	7.99	1.51553e+08	1132638976
Q01085	Nucleolysin TIAR OS=Homo sapiens OX=9606 GN=TIAL1 PE=1 SV=1	2	1	1	1	375	41.6	7.74		1.92378e+06
A0A1B0GUE3	Acid ceramidase OS=Homo sapiens OX=9606 GN=ASAH1 PE=1 SV=1	2	1	1	1	330	37.4	6.79		788780
S6AWD6	IgG L chain OS=Homo sapiens OX=9606 PE=2 SV=1	9	1	1	1	178	19.4	8.46		6895061
A0A5C2FXP4	IGL c1699_light_IGKV1D-13_IGKJ3 (Fragment) OS=Homo sapiens OX=9606 PE=2 SV=1	7	1	1	1	107	11.4	9.01	5.14848e+08	1944635648
P01024	Complement C3 OS=Homo sapiens OX=9606 GN=C3 PE=1 SV=2	1	1	1	1	1663	187	6.4
A0A5C2GS13	IG c275_light_IGKV3-20_IGKJ2 (Fragment) OS=Homo sapiens OX=9606 PE=2 SV=1	8	1	1	1	108	11.9	8.03	3.81335e+06	326936
A0A5C2G134	IGL c2842_light_IGKV1D-13_IGKJ4 (Fragment) OS=Homo sapiens OX=9606 PE=2 SV=1	15	1	1	1	107	11.3	8.47		3595936
A0A5C2GSB8	IG c271_light_IGLV1-40_IGLJ2 (Fragment) OS=Homo sapiens OX=9606 PE=2 SV=1	10	1	1	1	111	11.6	7.12		930274
M0R2Q7	Signal-induced proliferation-associated 1-like protein 3 (Fragment) OS=Homo sapiens OX=9606 GN=SIPA1L3 PE=1 SV=2	8	1	1	1	184	20.4	9.54		26399058
A0A384MDU2	Collagen, type I, alpha 2, isoform CRA_c OS=Homo sapiens OX=9606 GN=COL1A2 PE=2 SV=1	1	1	1	1	1366	129.2	8.95
B4DXF3	Bleomycin hydrolase OS=Homo sapiens OX=9606 PE=2 SV=1	2	1	1	1	368	42.4	6.25	2.14842e+06	2.58033e+06
