# Supplementary material for: Long non-coding RNA NMRAL2P promotes glycolysis and reduces ROS in head and neck tumors by interacting with the ENO1 protein and promoting GPX2 transcription
Source: PeerJ journal article supplement (doi:10.7717/peerj.16140), 2023-10-02
Supplement: Supplementary_Figure_S1.pdf [file Supplementary_Figure_S1.pdf]

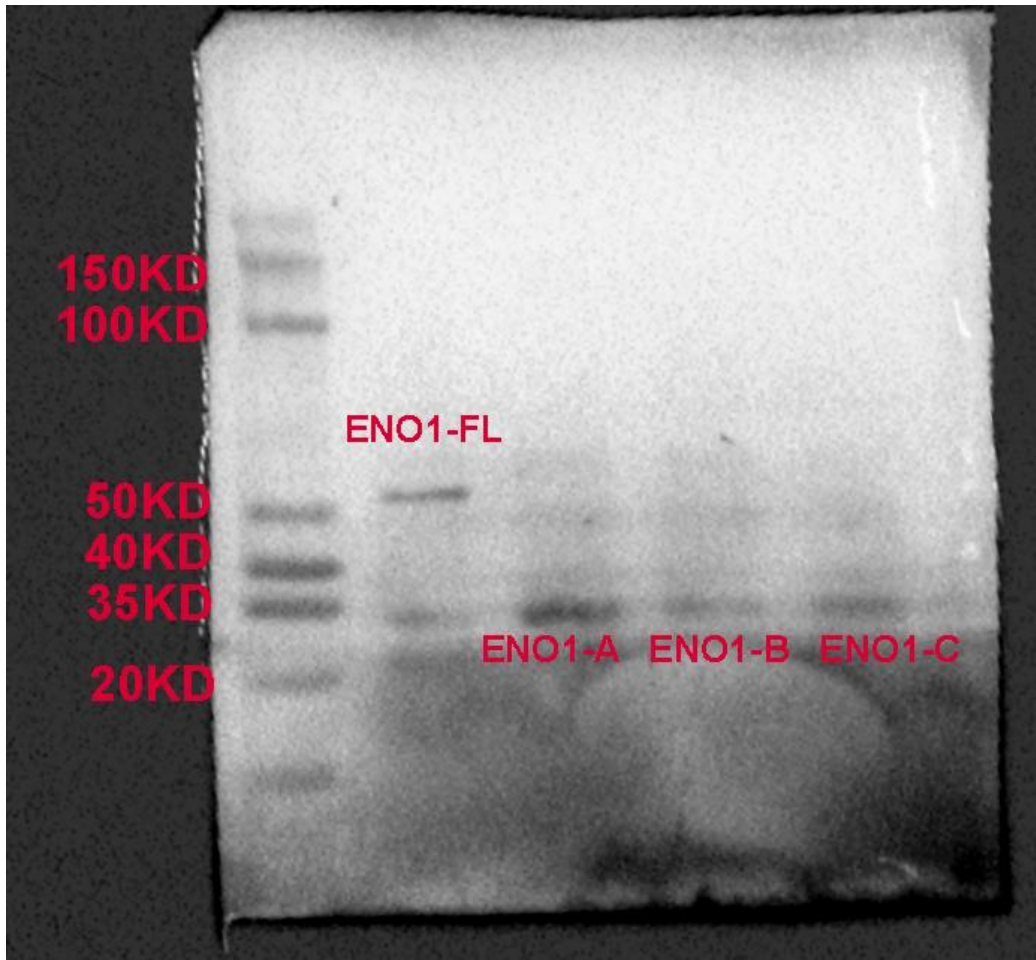

Supplementary Figure S1: Verifying ENO1 truncation efficiency by western blot
