# Supplementary material for: Long non-coding RNA NMRAL2P promotes glycolysis and reduces ROS in head and neck tumors by interacting with the ENO1 protein and promoting GPX2 transcription
Source: PeerJ journal article supplement (doi:10.7717/peerj.16140), 2023-10-02
Supplement: Supplementary_Figure_S2.pdf [file Supplementary_Figure_S2.pdf]

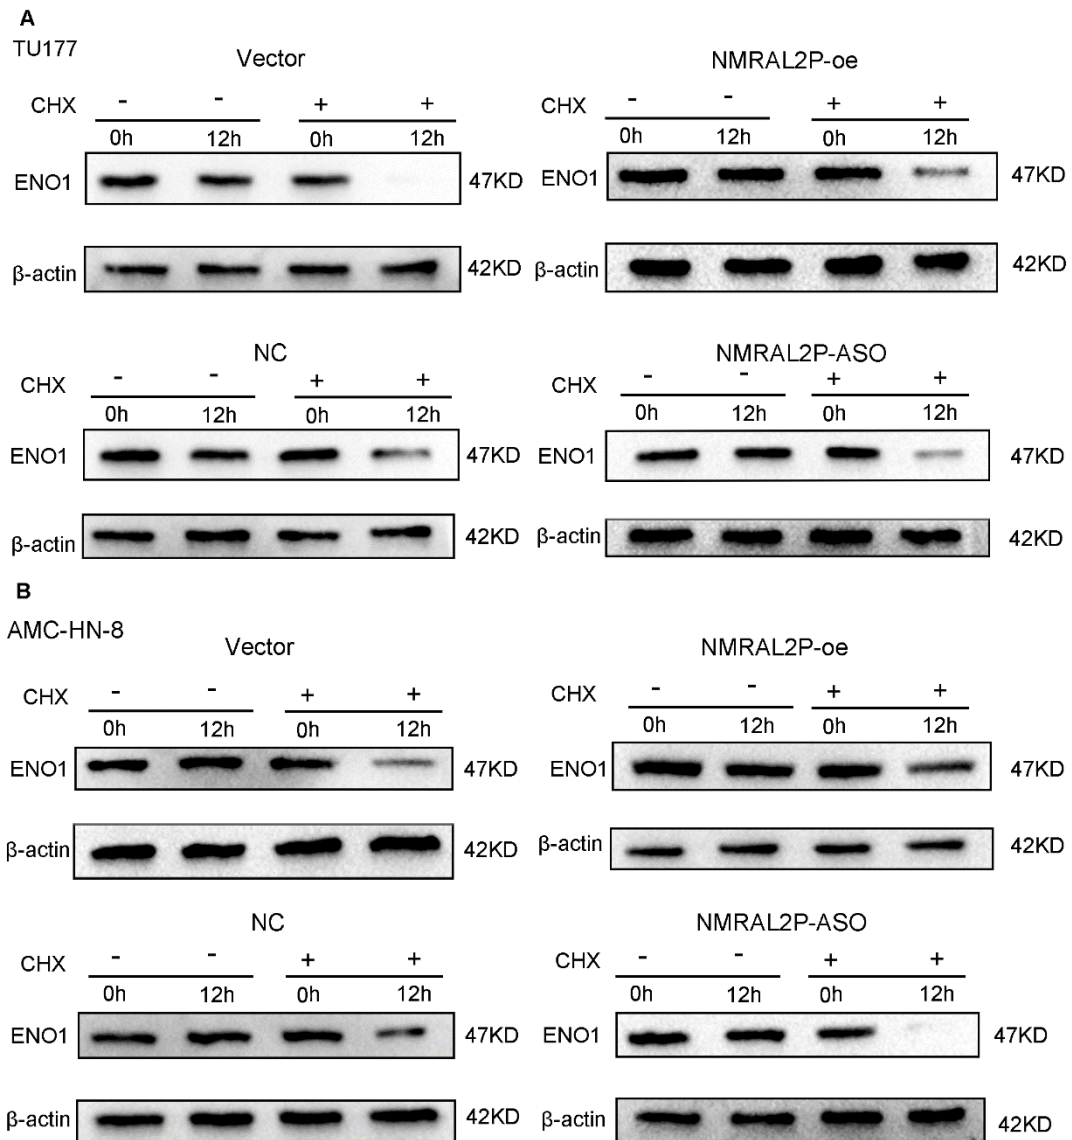

Supplementary Figure S2: Verification of the effectiveness of cycloheximide. (A-B): After TU177 and AMC-HN-8 cells transfected into NMRAL2P-oe, NMRAL2P-ASO and the corresponding negative control groups Vector (pcDNA3.1), NC (NC-ASO), the changes of ENO1 protein were compared by western blot after 12 hours with and without cycloheximide. (CHX: cycloheximide)
