# Supplementary material for: Long non-coding RNA NMRAL2P promotes glycolysis and reduces ROS in head and neck tumors by interacting with the ENO1 protein and promoting GPX2 transcription
Source: PeerJ journal article supplement (doi:10.7717/peerj.16140), 2023-10-02
Supplement: Supplementary_Figure_S3.pdf [file Supplementary_Figure_S3.pdf]

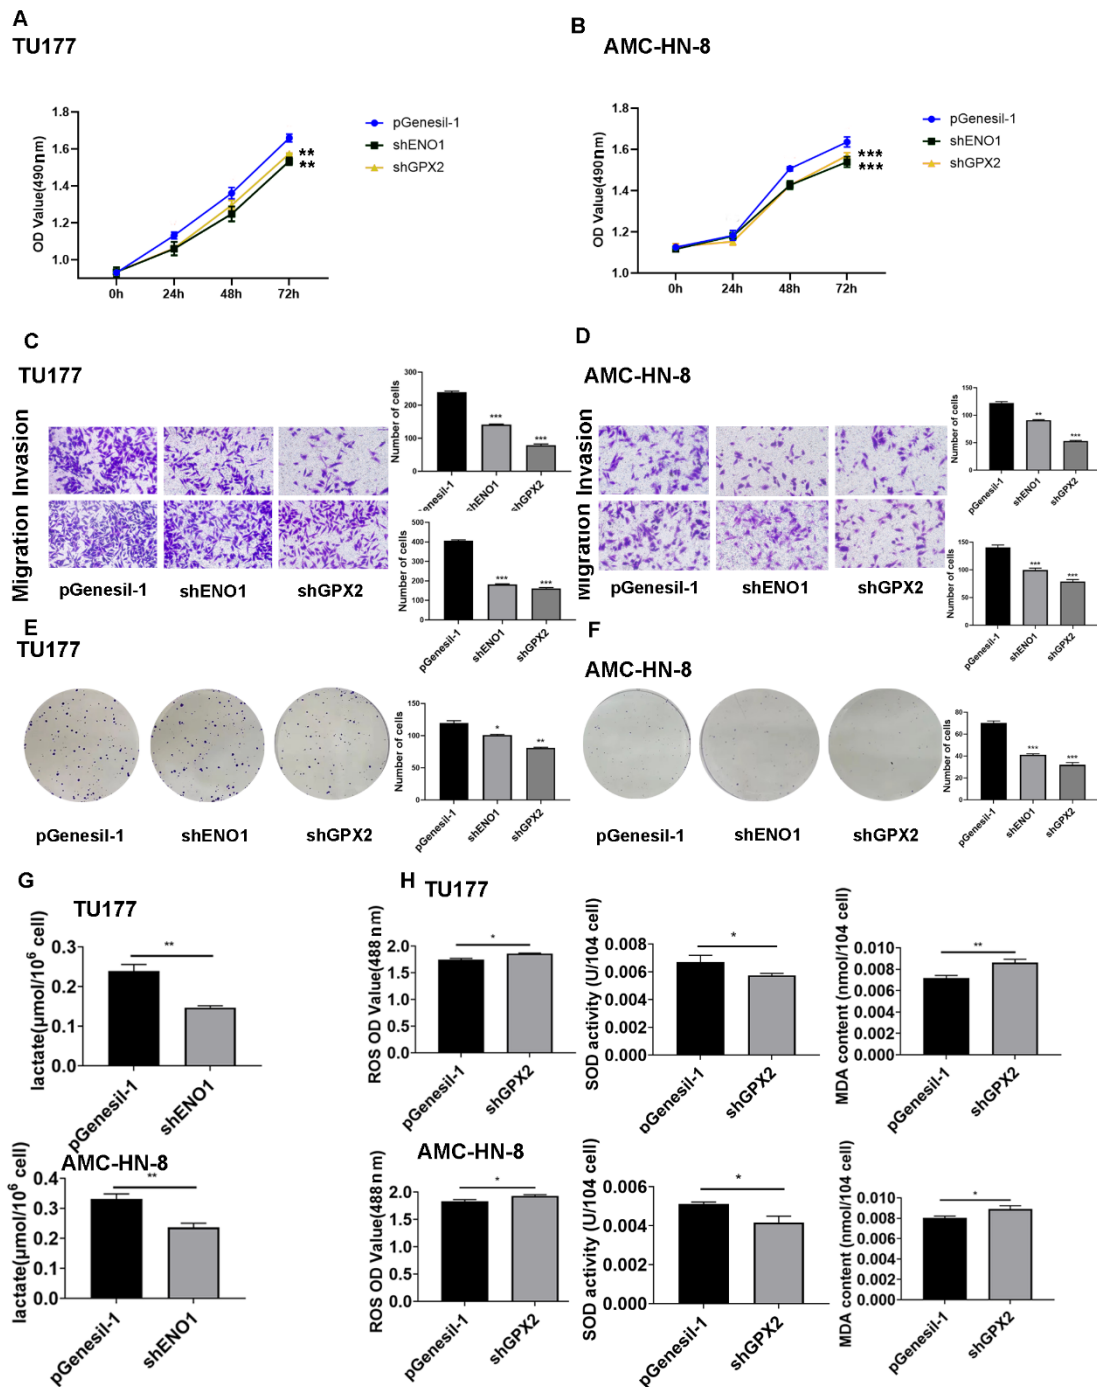

Supplementary Figure S3: ENO1 and GPX2 knock down function assay. (A-B): The changes of cell viability of TU177 and AMC-HN-8 after transferred into shENO1 and shGPX2 were verified by MTS assay. (C-D): the changes of cell migration and invasion ability of TU177 and AMC-HN-8 after transferred into shENO1 and shGPX2 were verified by transwell assay. (E-F): the changes of proliferation activity of TU177 and AMC-HN-8 after transferred into shENO1 and shGPX2 were verified by clone formation assay. (G): The changes of lactate levels in TU177 and AMC-HN-8 cells after transferred into shENO1 were verified by lactic acid kit. (H): The changes of ROS yield,

SOD activity and MAD content in TU177 and AMC-HN-8 cells after transferred into shGPX2 were verified. (ROS: Reactive Oxygen Species, SOD: Superoxide Dismutase, MAD: Malondialdehyde)
