# Supplementary material for: Long non-coding RNA NMRAL2P promotes glycolysis and reduces ROS in head and neck tumors by interacting with the ENO1 protein and promoting GPX2 transcription
Source: PeerJ journal article supplement (doi:10.7717/peerj.16140), 2023-10-02
Supplement: Supplementary_file_3.zip [file Supplementary_file_3.zip]

### Certificate of Analysis

**Project Tracking #**

80-1048012668

**Quote #**

80-1048012668\_R19

**Clone ID #**

AA47641-1/C915302

**Sequence Name**

1-434aa in pcDNA3.1

**Cloning Vector**

pcDNA3.1(+)

**Cloning Sites**

5' HindIII and 3' BamHI

**Insert Length**

1383

| QC Item                            | Specification                                           | Results          |
|------------------------------------|---------------------------------------------------------|------------------|
| Insert Sequence                    | Insert sequence results consistent with target          | √ Pass           |
| Vector Sequence                    | Flanking sequence consistent with expected              | √ Pass           |
| Open Reading Frame across junction | Correct and consistent with target                      | n/a              |
| Restriction Digest                 | Expected fragment sizes observed                        | √ Pass           |
| PCR amplification                  | Correct without non-specific bands                      | n/a              |
| DNA Quantity and Quality           | Actual yield (by A <sub>260</sub> )                     | 4 ug             |
|                                    | Concentration (n/a if lyophilized)                      | n/a              |
|                                    | Purity (A <sub>260</sub> /A <sub>280</sub> = 1.8 - 2.0) | √ Pass           |
|                                    | # of tubes                                              | 1                |
|                                    | Matrix                                                  | TE (lyophilized) |
| Endotoxin Test                     | Verified, <0.1 EU/ug(endo-free preps only)              | n/a              |
| Appearance                         | Clear, no visible particles                             | √ Pass           |
| Label                              | Correct and clear                                       | √ Pass           |
| Comments                           |                                                         |                  |

#### Restriction Digest Test Results

| 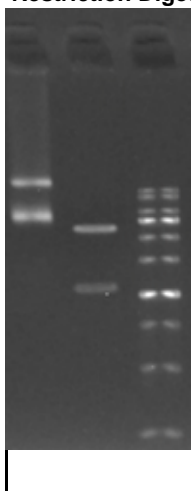 | <p>Lane Description( from left to right)</p> <p>Lane 1: undigested</p> <p>Lane 2: digested with Sall</p> <p>Lane 3: ladder</p> | <p>1kb ladder</p> <table><tr><th>bp</th><th>ng/5μl</th></tr><tr><td>10000</td><td>40</td></tr><tr><td>8000</td><td>40</td></tr><tr><td>6000</td><td>40</td></tr><tr><td>5000</td><td>100</td></tr><tr><td>4000</td><td>40</td></tr><tr><td>3000</td><td>40</td></tr><tr><td>2000</td><td>100</td></tr><tr><td>1500</td><td>40</td></tr><tr><td>1000</td><td>40</td></tr><tr><td>500</td><td>40</td></tr></table> <p>1% agarose</p> | bp | ng/5μl | 10000 | 40 | 8000 | 40 | 6000 | 40 | 5000 | 100 | 4000 | 40 | 3000 | 40 | 2000 | 100 | 1500 | 40 | 1000 | 40 | 500 | 40 |
|------------------------------------------------------------------------------------|--------------------------------------------------------------------------------------------------------------------------------|------------------------------------------------------------------------------------------------------------------------------------------------------------------------------------------------------------------------------------------------------------------------------------------------------------------------------------------------------------------------------------------------------------------------------------|----|--------|-------|----|------|----|------|----|------|-----|------|----|------|----|------|-----|------|----|------|----|-----|----|
| bp                                                                                 | ng/5μl                                                                                                                         |                                                                                                                                                                                                                                                                                                                                                                                                                                    |    |        |       |    |      |    |      |    |      |     |      |    |      |    |      |     |      |    |      |    |     |    |
| 10000                                                                              | 40                                                                                                                             |                                                                                                                                                                                                                                                                                                                                                                                                                                    |    |        |       |    |      |    |      |    |      |     |      |    |      |    |      |     |      |    |      |    |     |    |
| 8000                                                                               | 40                                                                                                                             |                                                                                                                                                                                                                                                                                                                                                                                                                                    |    |        |       |    |      |    |      |    |      |     |      |    |      |    |      |     |      |    |      |    |     |    |
| 6000                                                                               | 40                                                                                                                             |                                                                                                                                                                                                                                                                                                                                                                                                                                    |    |        |       |    |      |    |      |    |      |     |      |    |      |    |      |     |      |    |      |    |     |    |
| 5000                                                                               | 100                                                                                                                            |                                                                                                                                                                                                                                                                                                                                                                                                                                    |    |        |       |    |      |    |      |    |      |     |      |    |      |    |      |     |      |    |      |    |     |    |
| 4000                                                                               | 40                                                                                                                             |                                                                                                                                                                                                                                                                                                                                                                                                                                    |    |        |       |    |      |    |      |    |      |     |      |    |      |    |      |     |      |    |      |    |     |    |
| 3000                                                                               | 40                                                                                                                             |                                                                                                                                                                                                                                                                                                                                                                                                                                    |    |        |       |    |      |    |      |    |      |     |      |    |      |    |      |     |      |    |      |    |     |    |
| 2000                                                                               | 100                                                                                                                            |                                                                                                                                                                                                                                                                                                                                                                                                                                    |    |        |       |    |      |    |      |    |      |     |      |    |      |    |      |     |      |    |      |    |     |    |
| 1500                                                                               | 40                                                                                                                             |                                                                                                                                                                                                                                                                                                                                                                                                                                    |    |        |       |    |      |    |      |    |      |     |      |    |      |    |      |     |      |    |      |    |     |    |
| 1000                                                                               | 40                                                                                                                             |                                                                                                                                                                                                                                                                                                                                                                                                                                    |    |        |       |    |      |    |      |    |      |     |      |    |      |    |      |     |      |    |      |    |     |    |
| 500                                                                                | 40                                                                                                                             |                                                                                                                                                                                                                                                                                                                                                                                                                                    |    |        |       |    |      |    |      |    |      |     |      |    |      |    |      |     |      |    |      |    |     |    |

**Certified By**

Tianxing Ye

**Date**

11/05/2022
