# Supplementary figures and images for: Long non-coding RNA NMRAL2P promotes glycolysis and reduces ROS in head and neck tumors by interacting with the ENO1 protein and promoting GPX2 transcription
Source: PeerJ journal article supplement (doi:10.7717/peerj.16140), 2023-10-02

Project: Untitled.sqd Contig 4

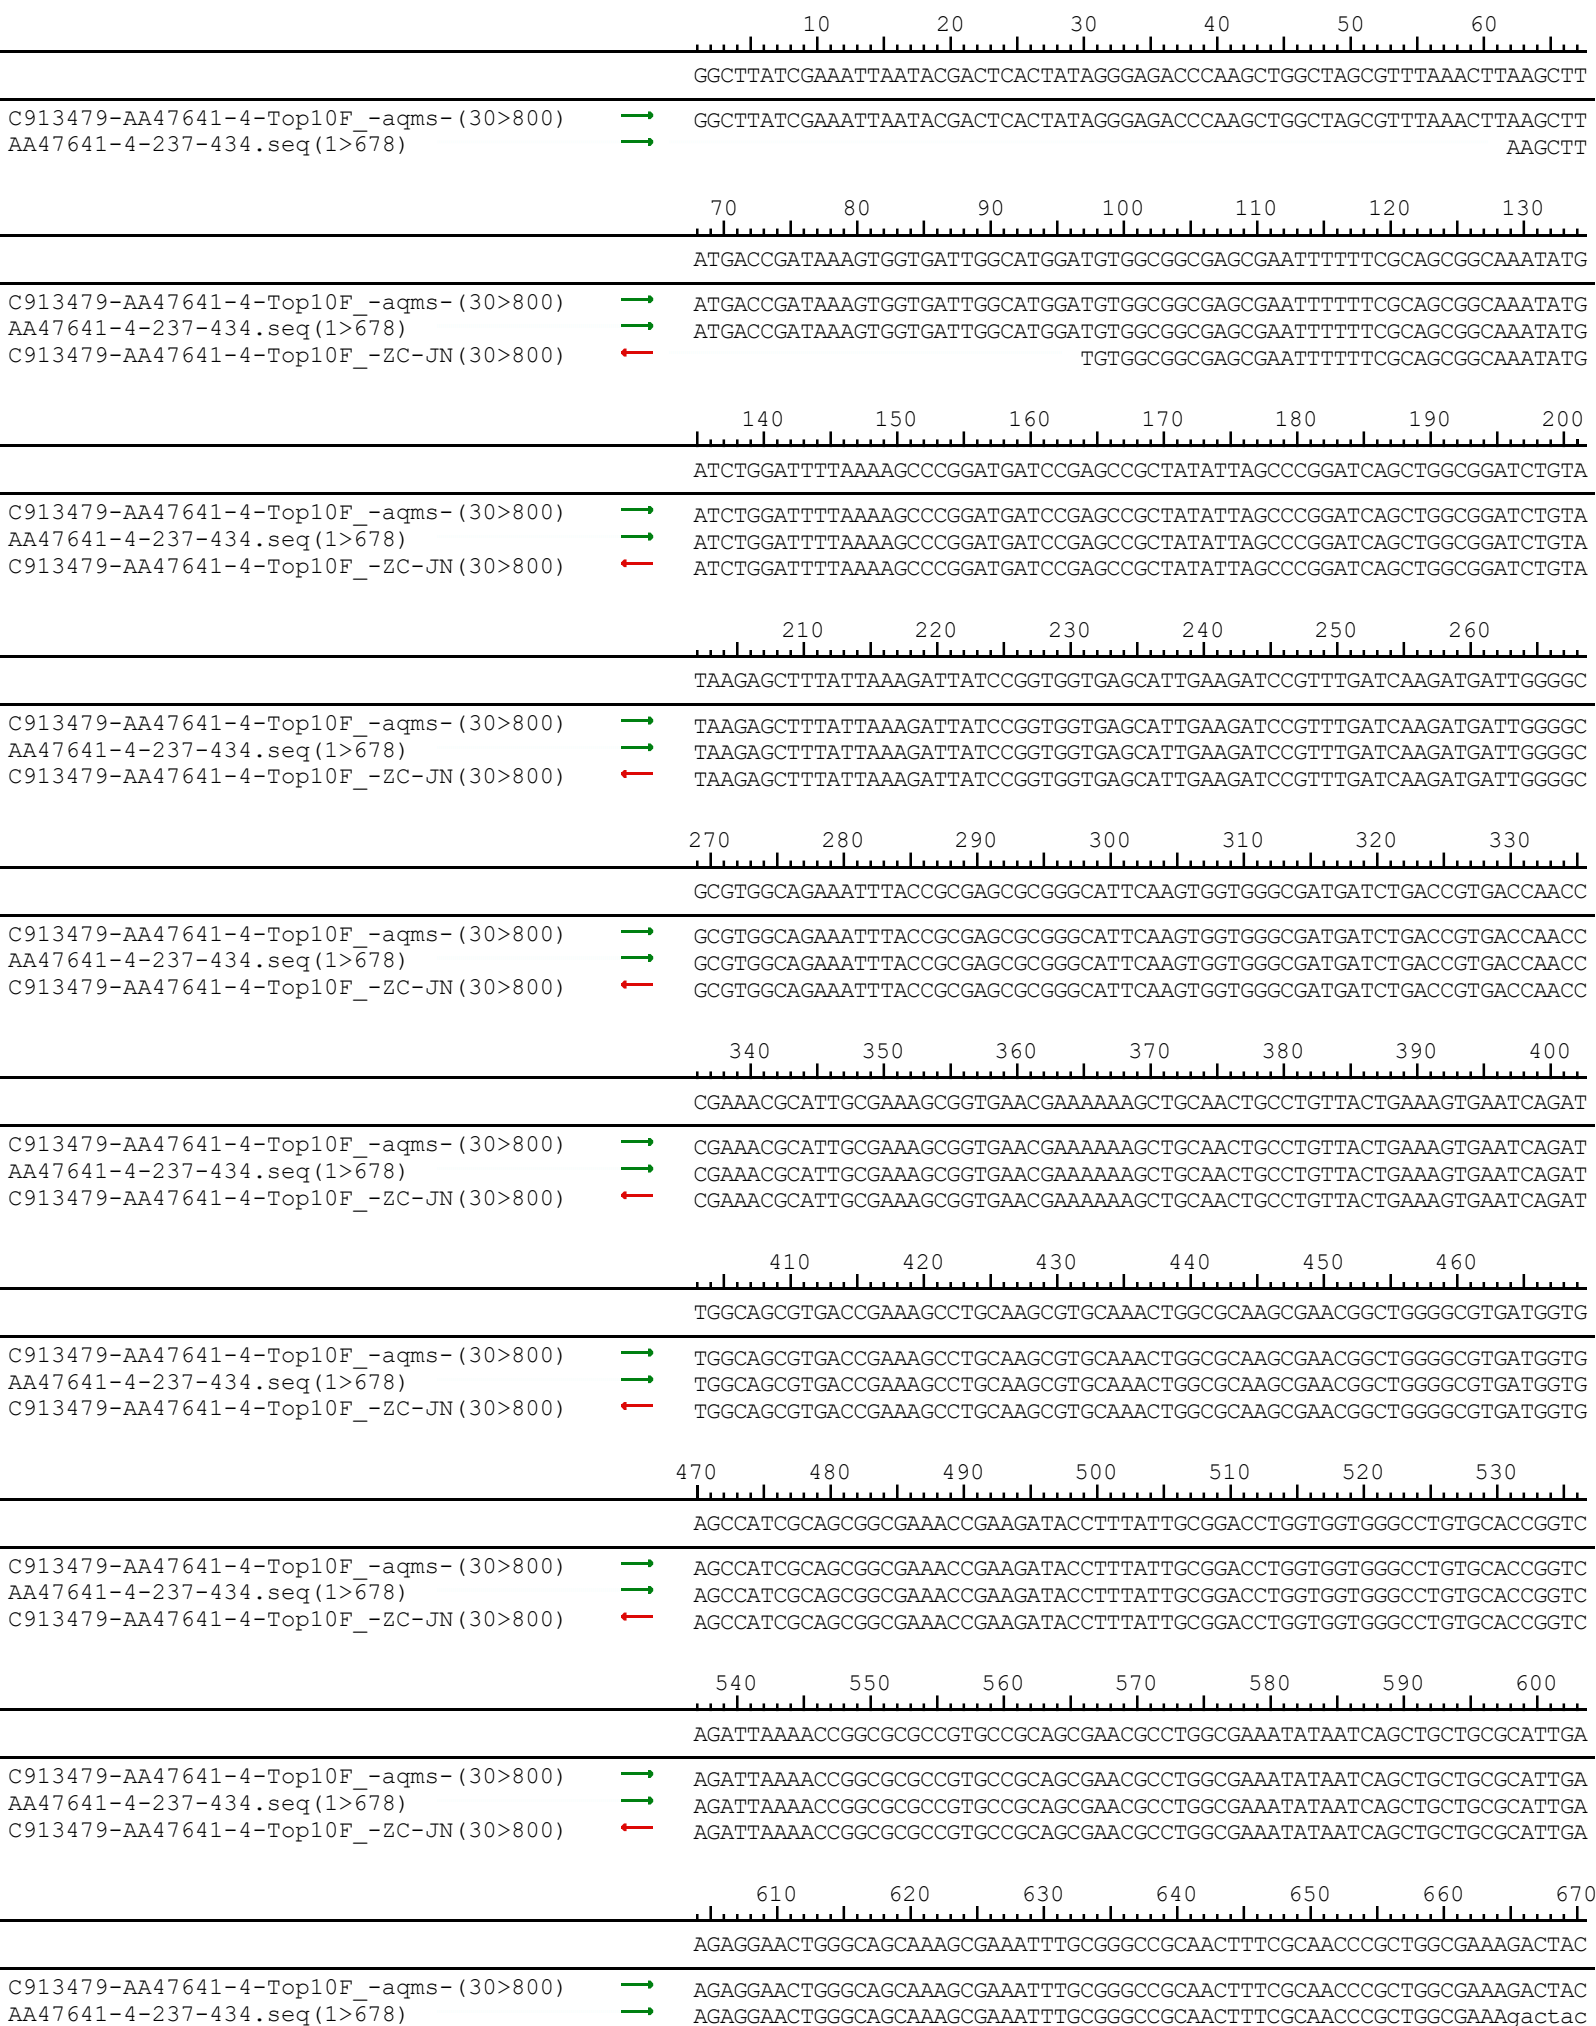

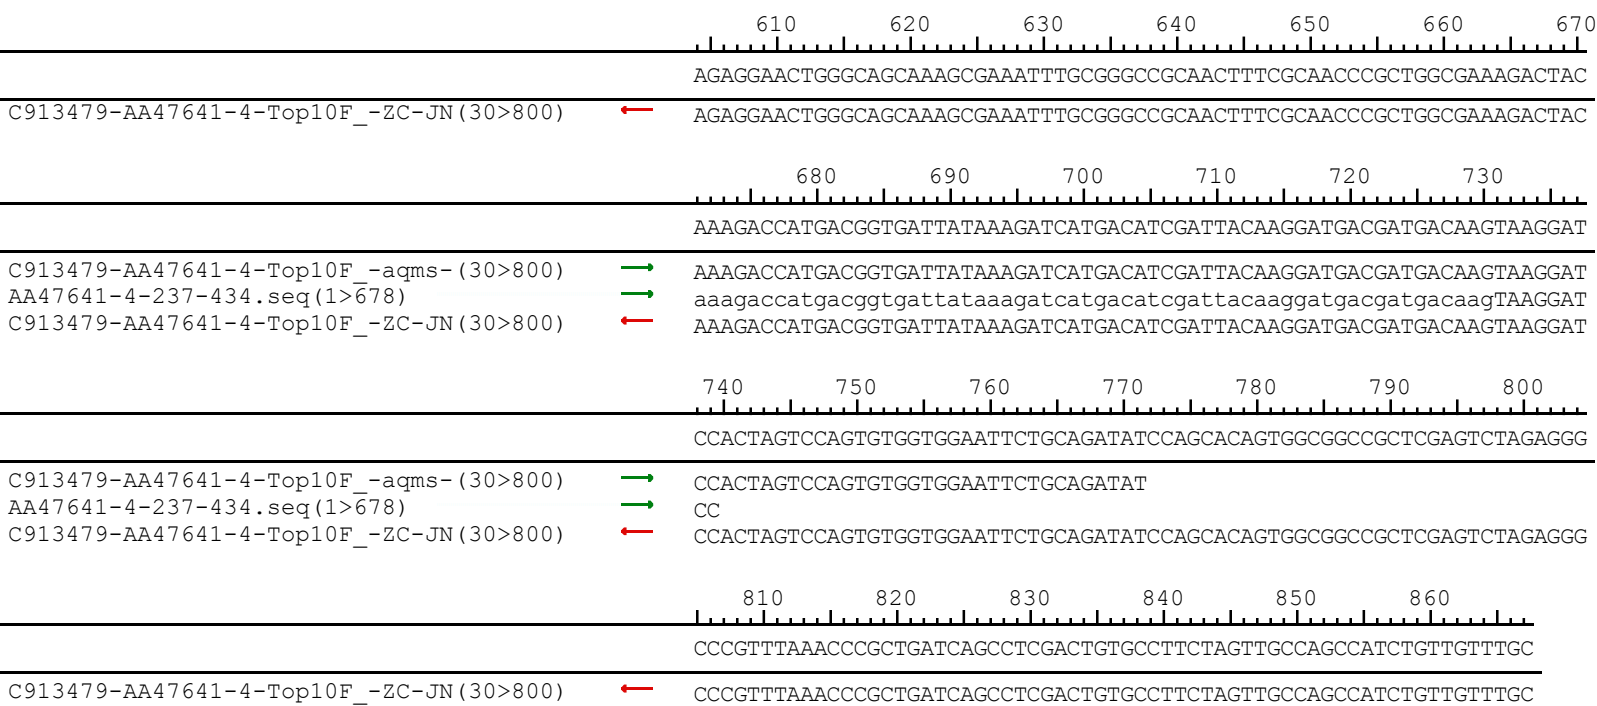

Supplement: Supplementary_file_3.zip [file Supplementary_file_3.zip]

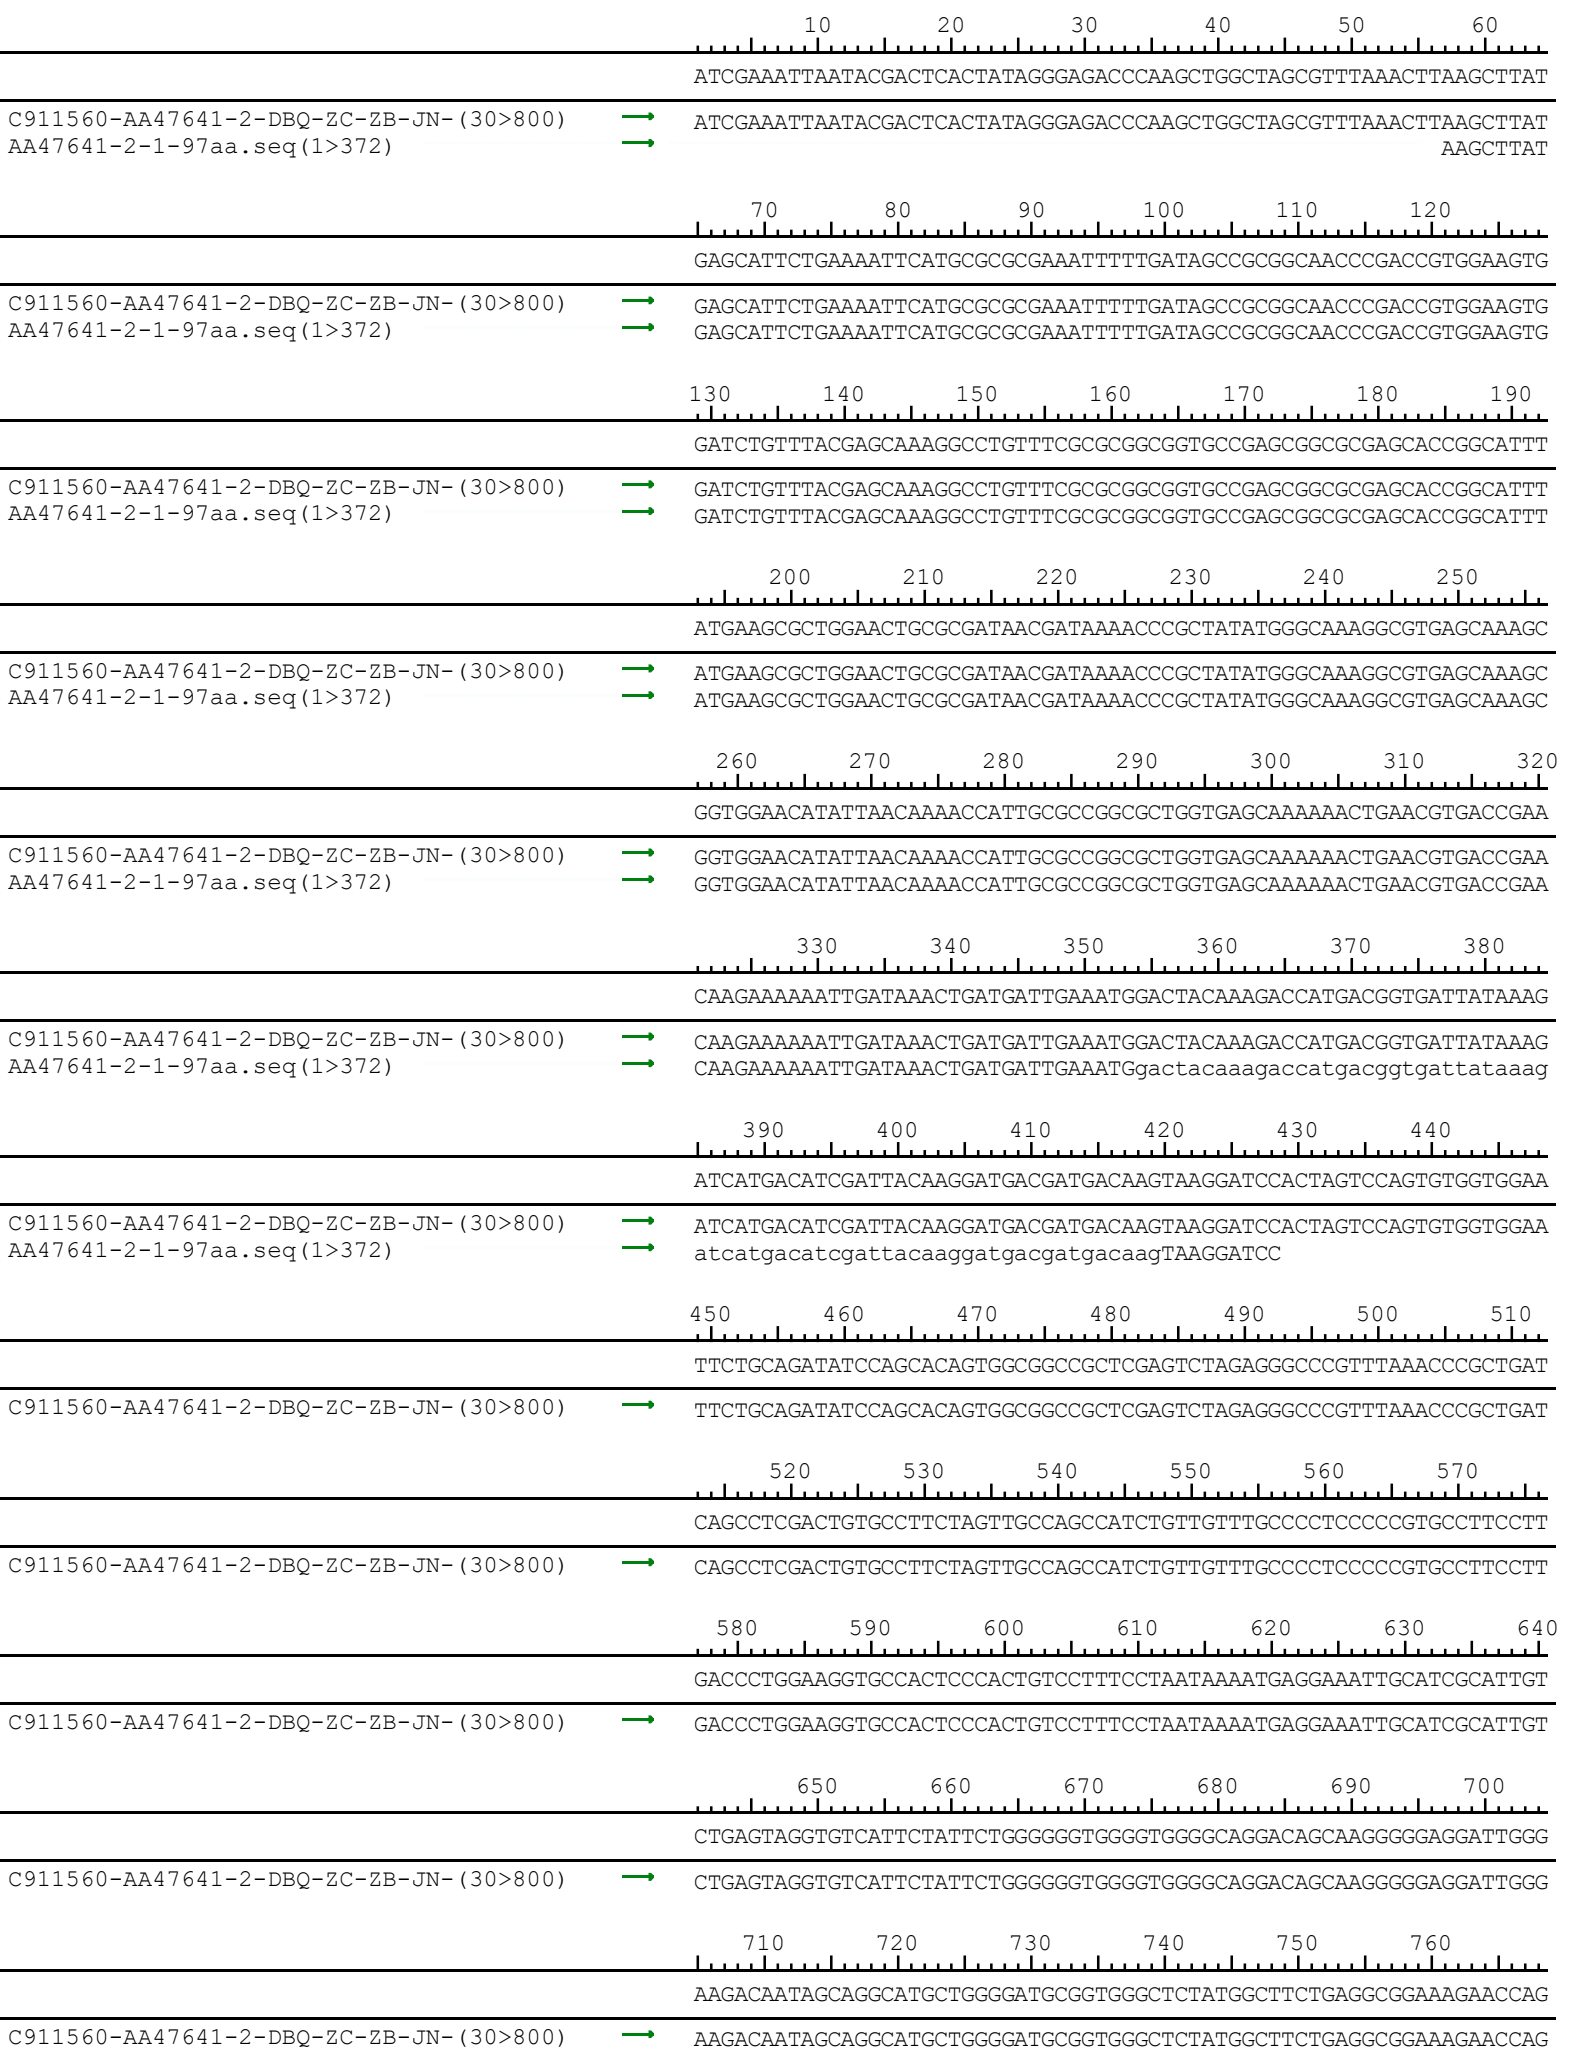

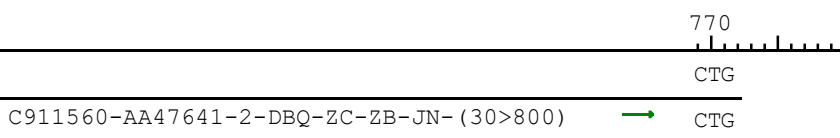

Supplement: Supplementary_file_3.zip [file Supplementary_file_3.zip]

Project: Untitled.sqd Contig 4

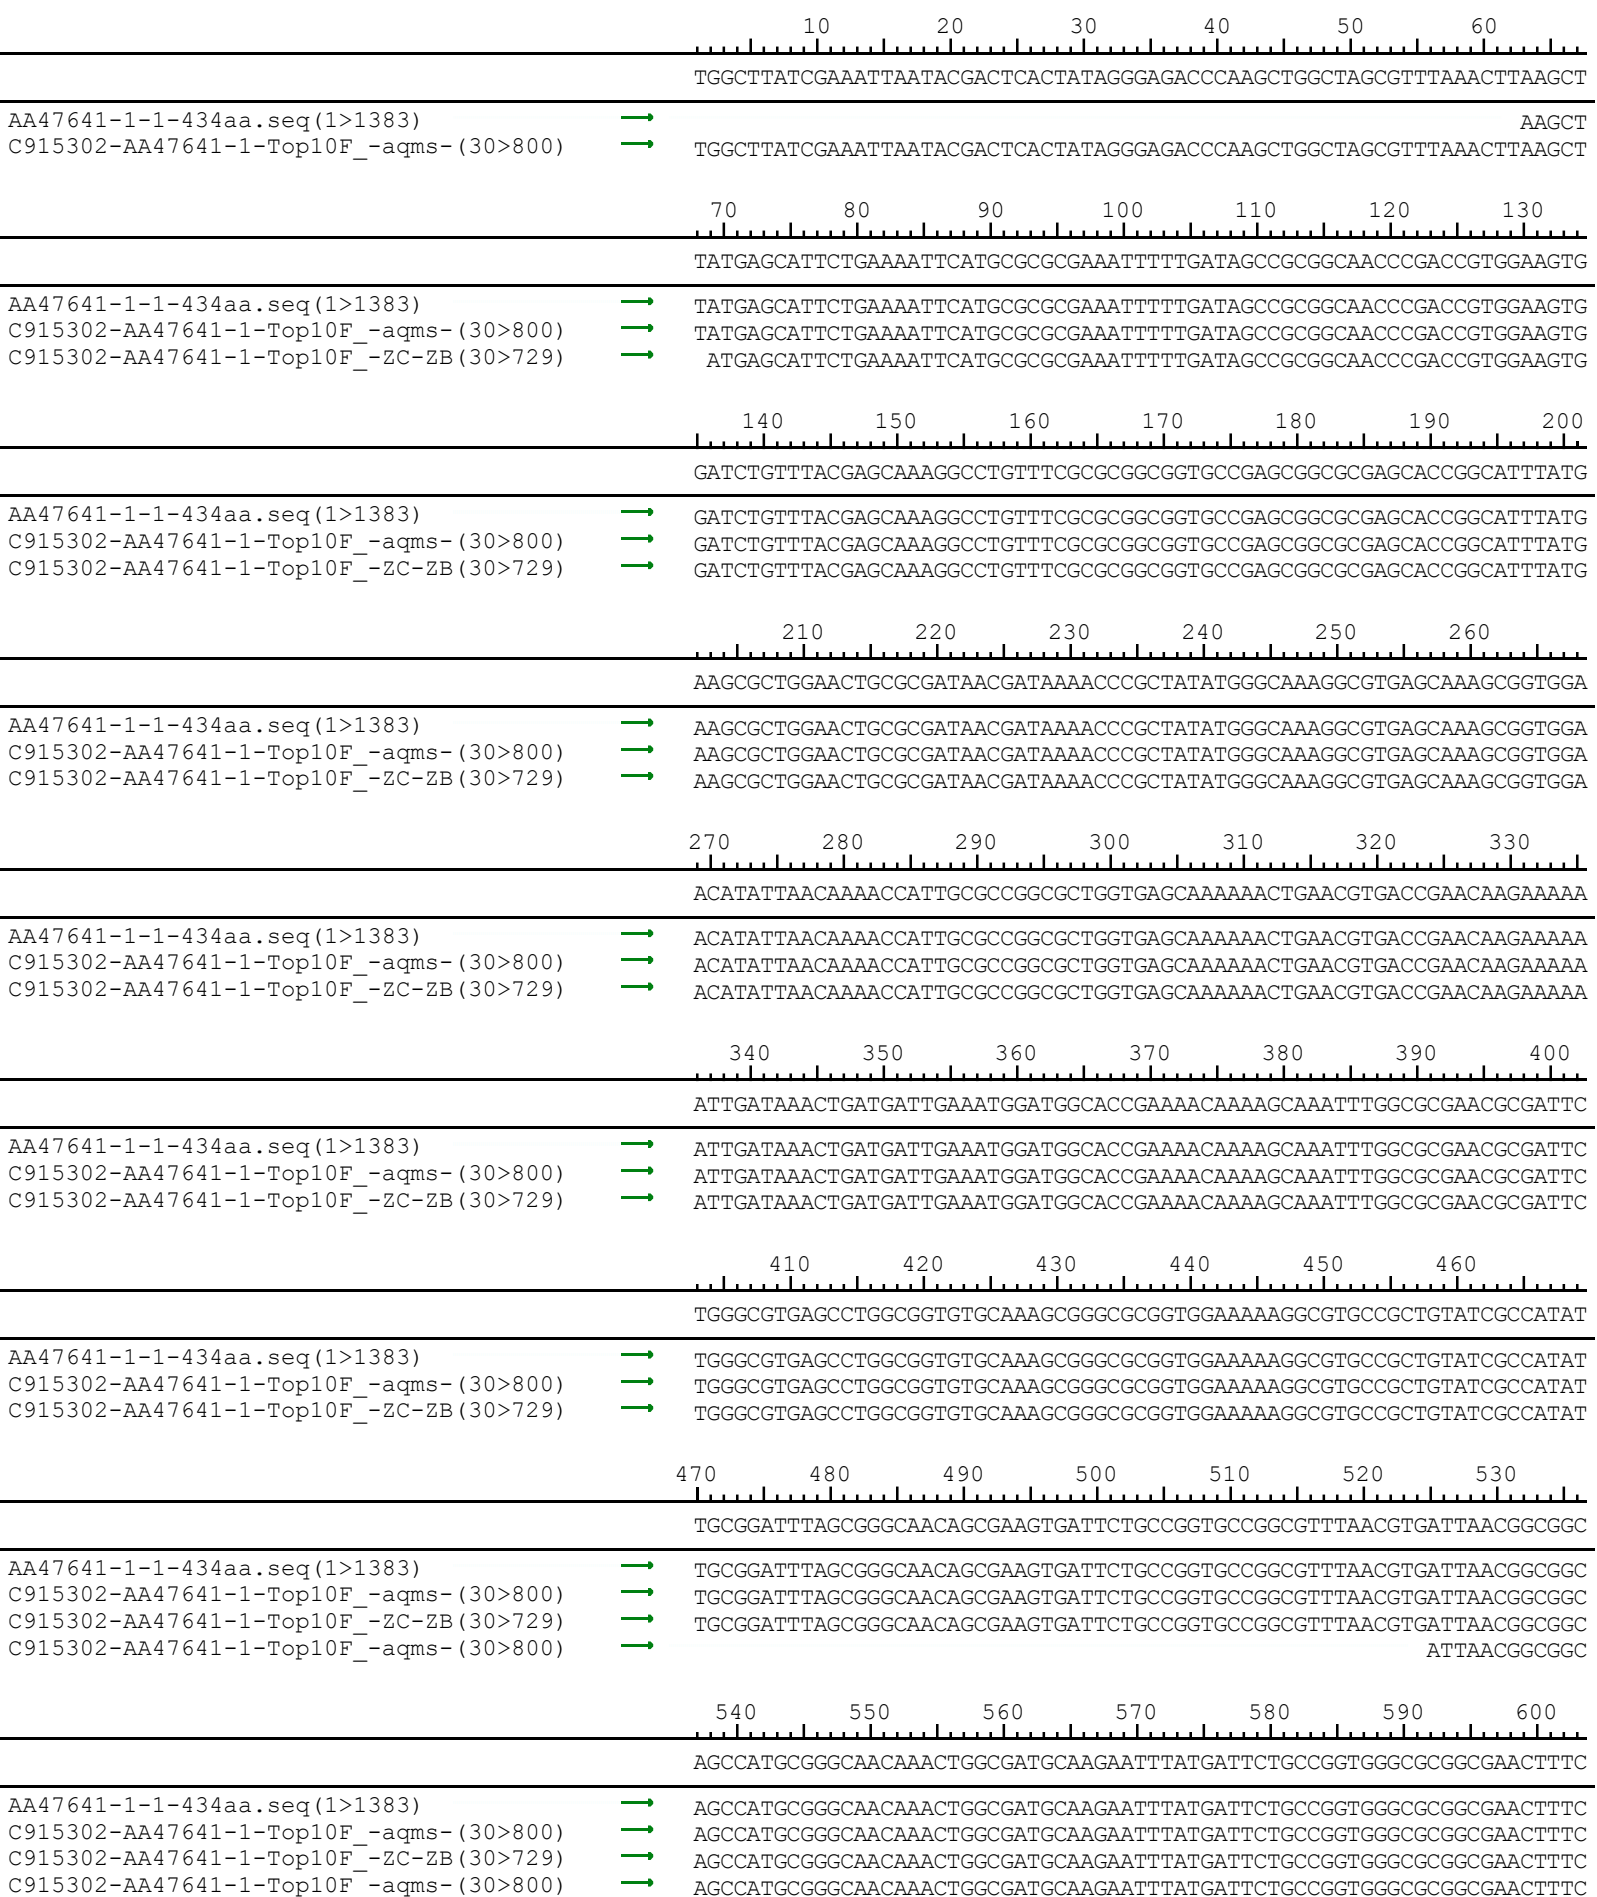

Project: Untitled.sqd Contig 4

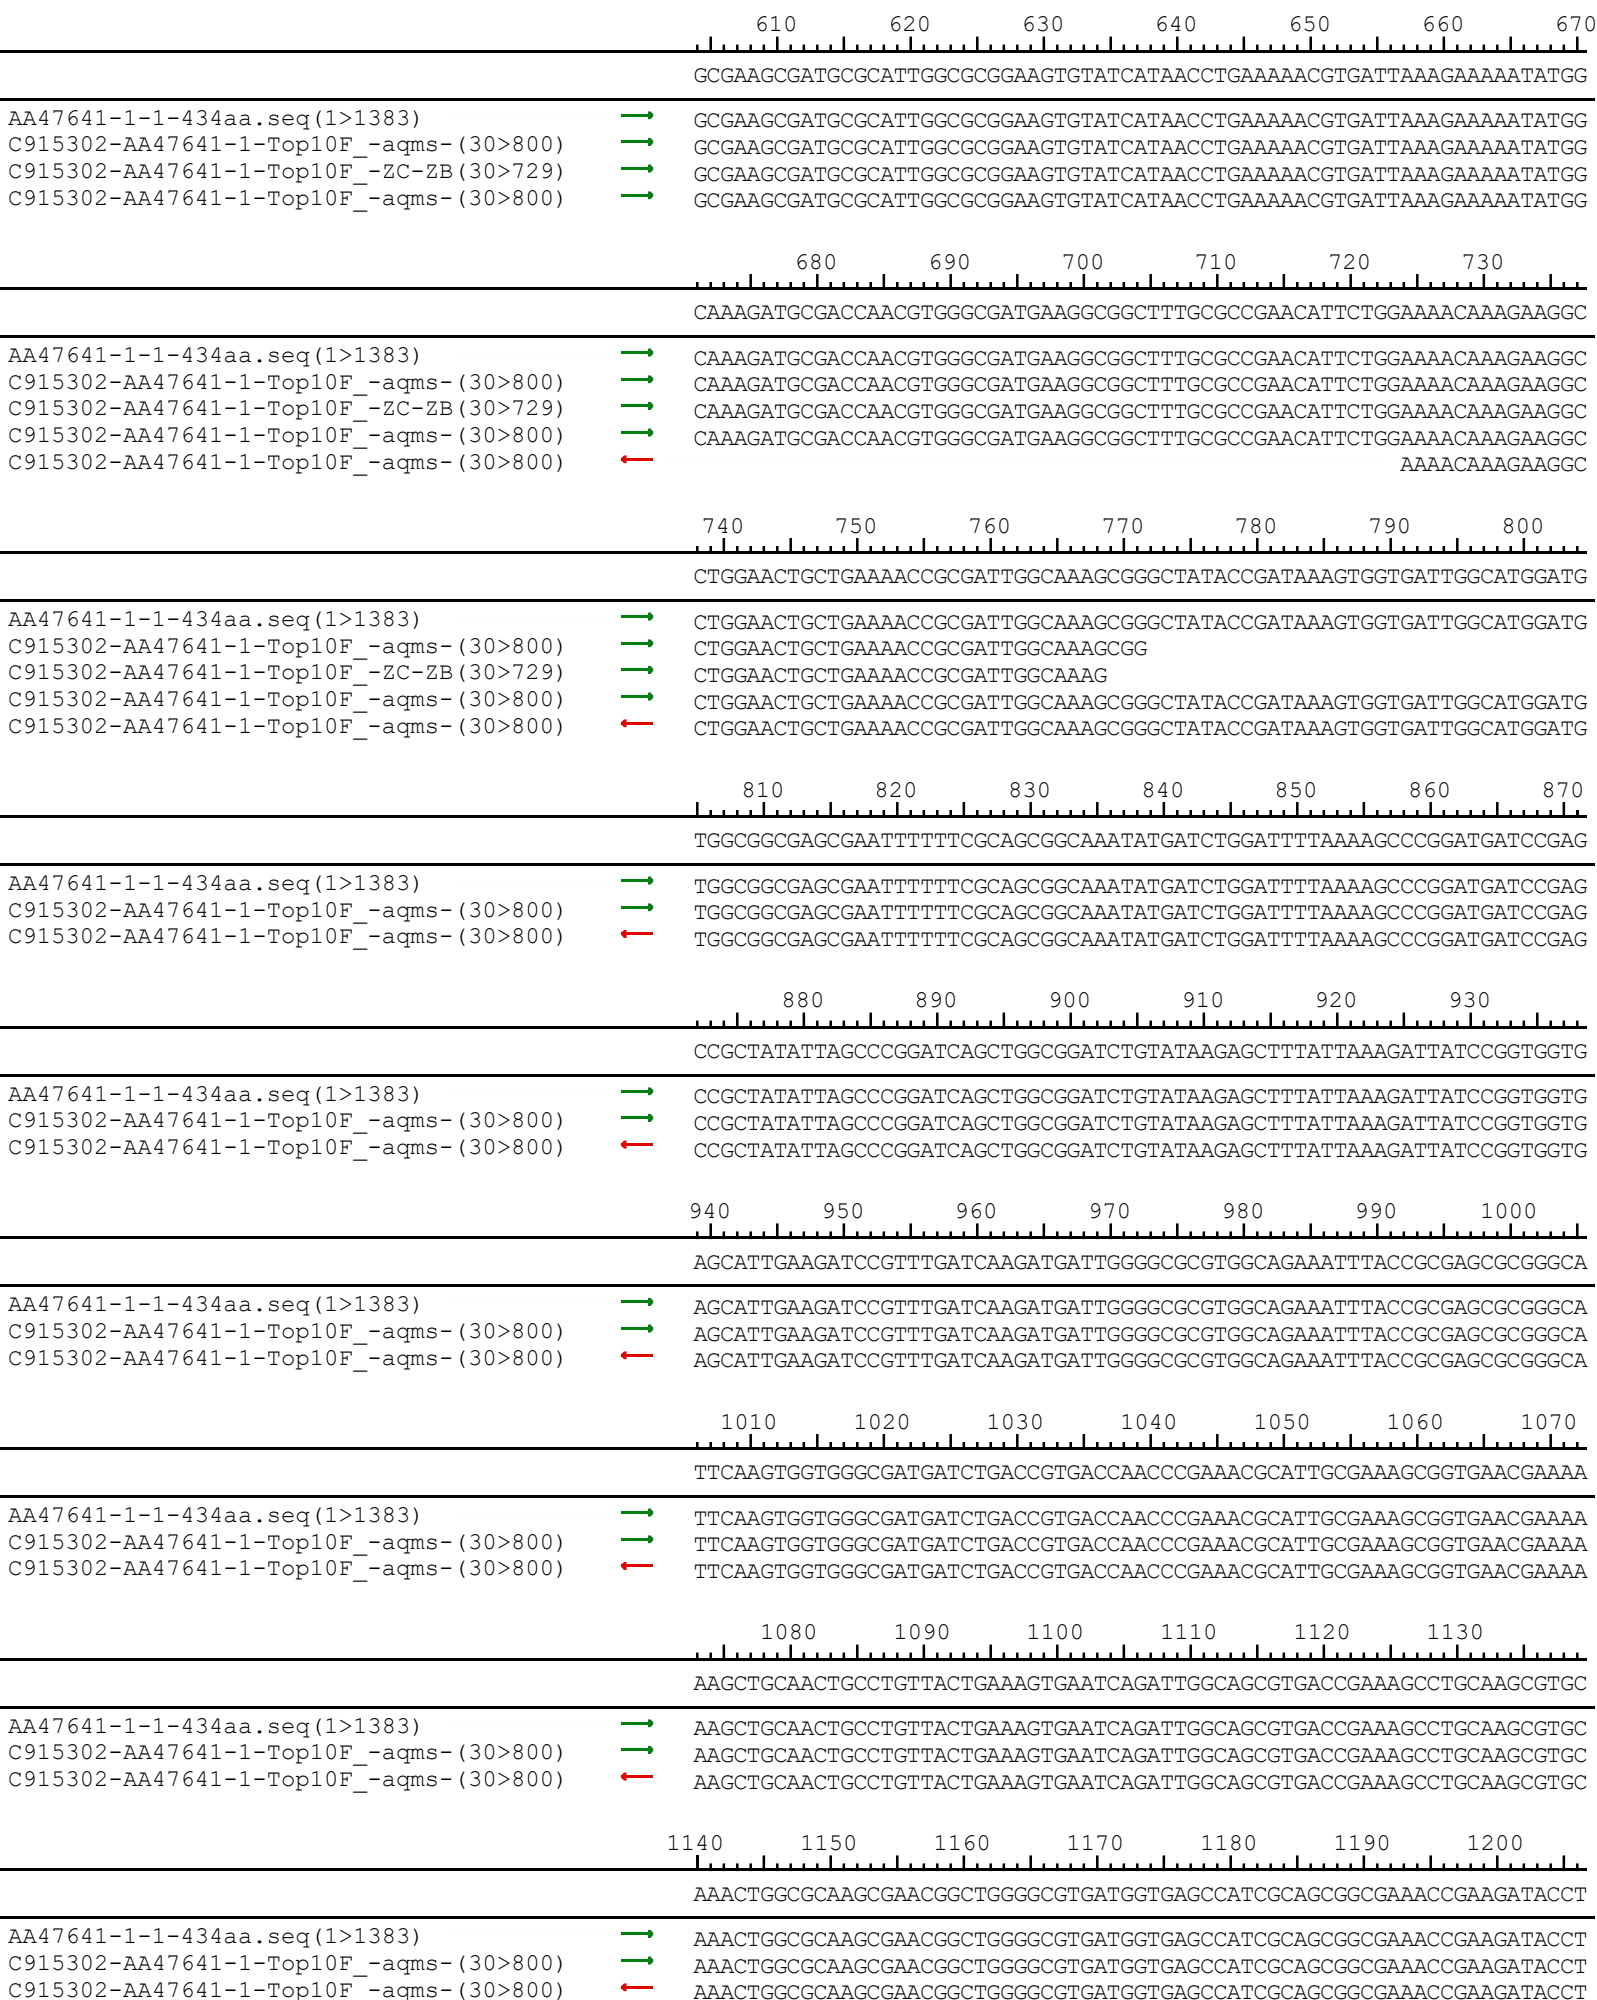

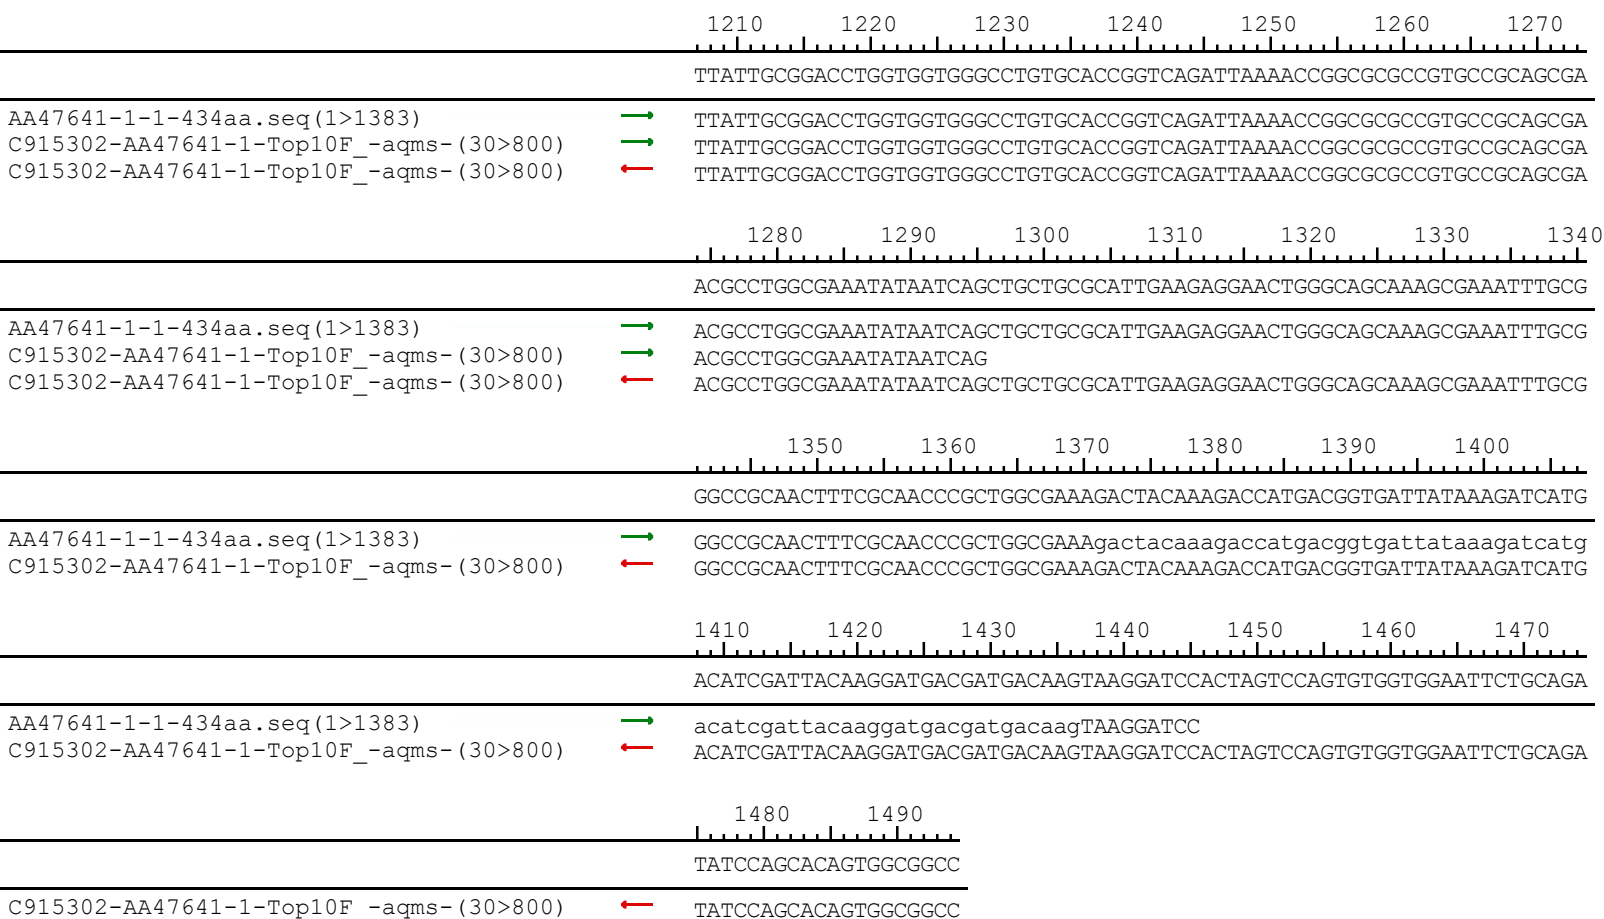

Supplement: Supplementary_file_3.zip [file Supplementary_file_3.zip]

Project: Untitled.sqd Contig 4

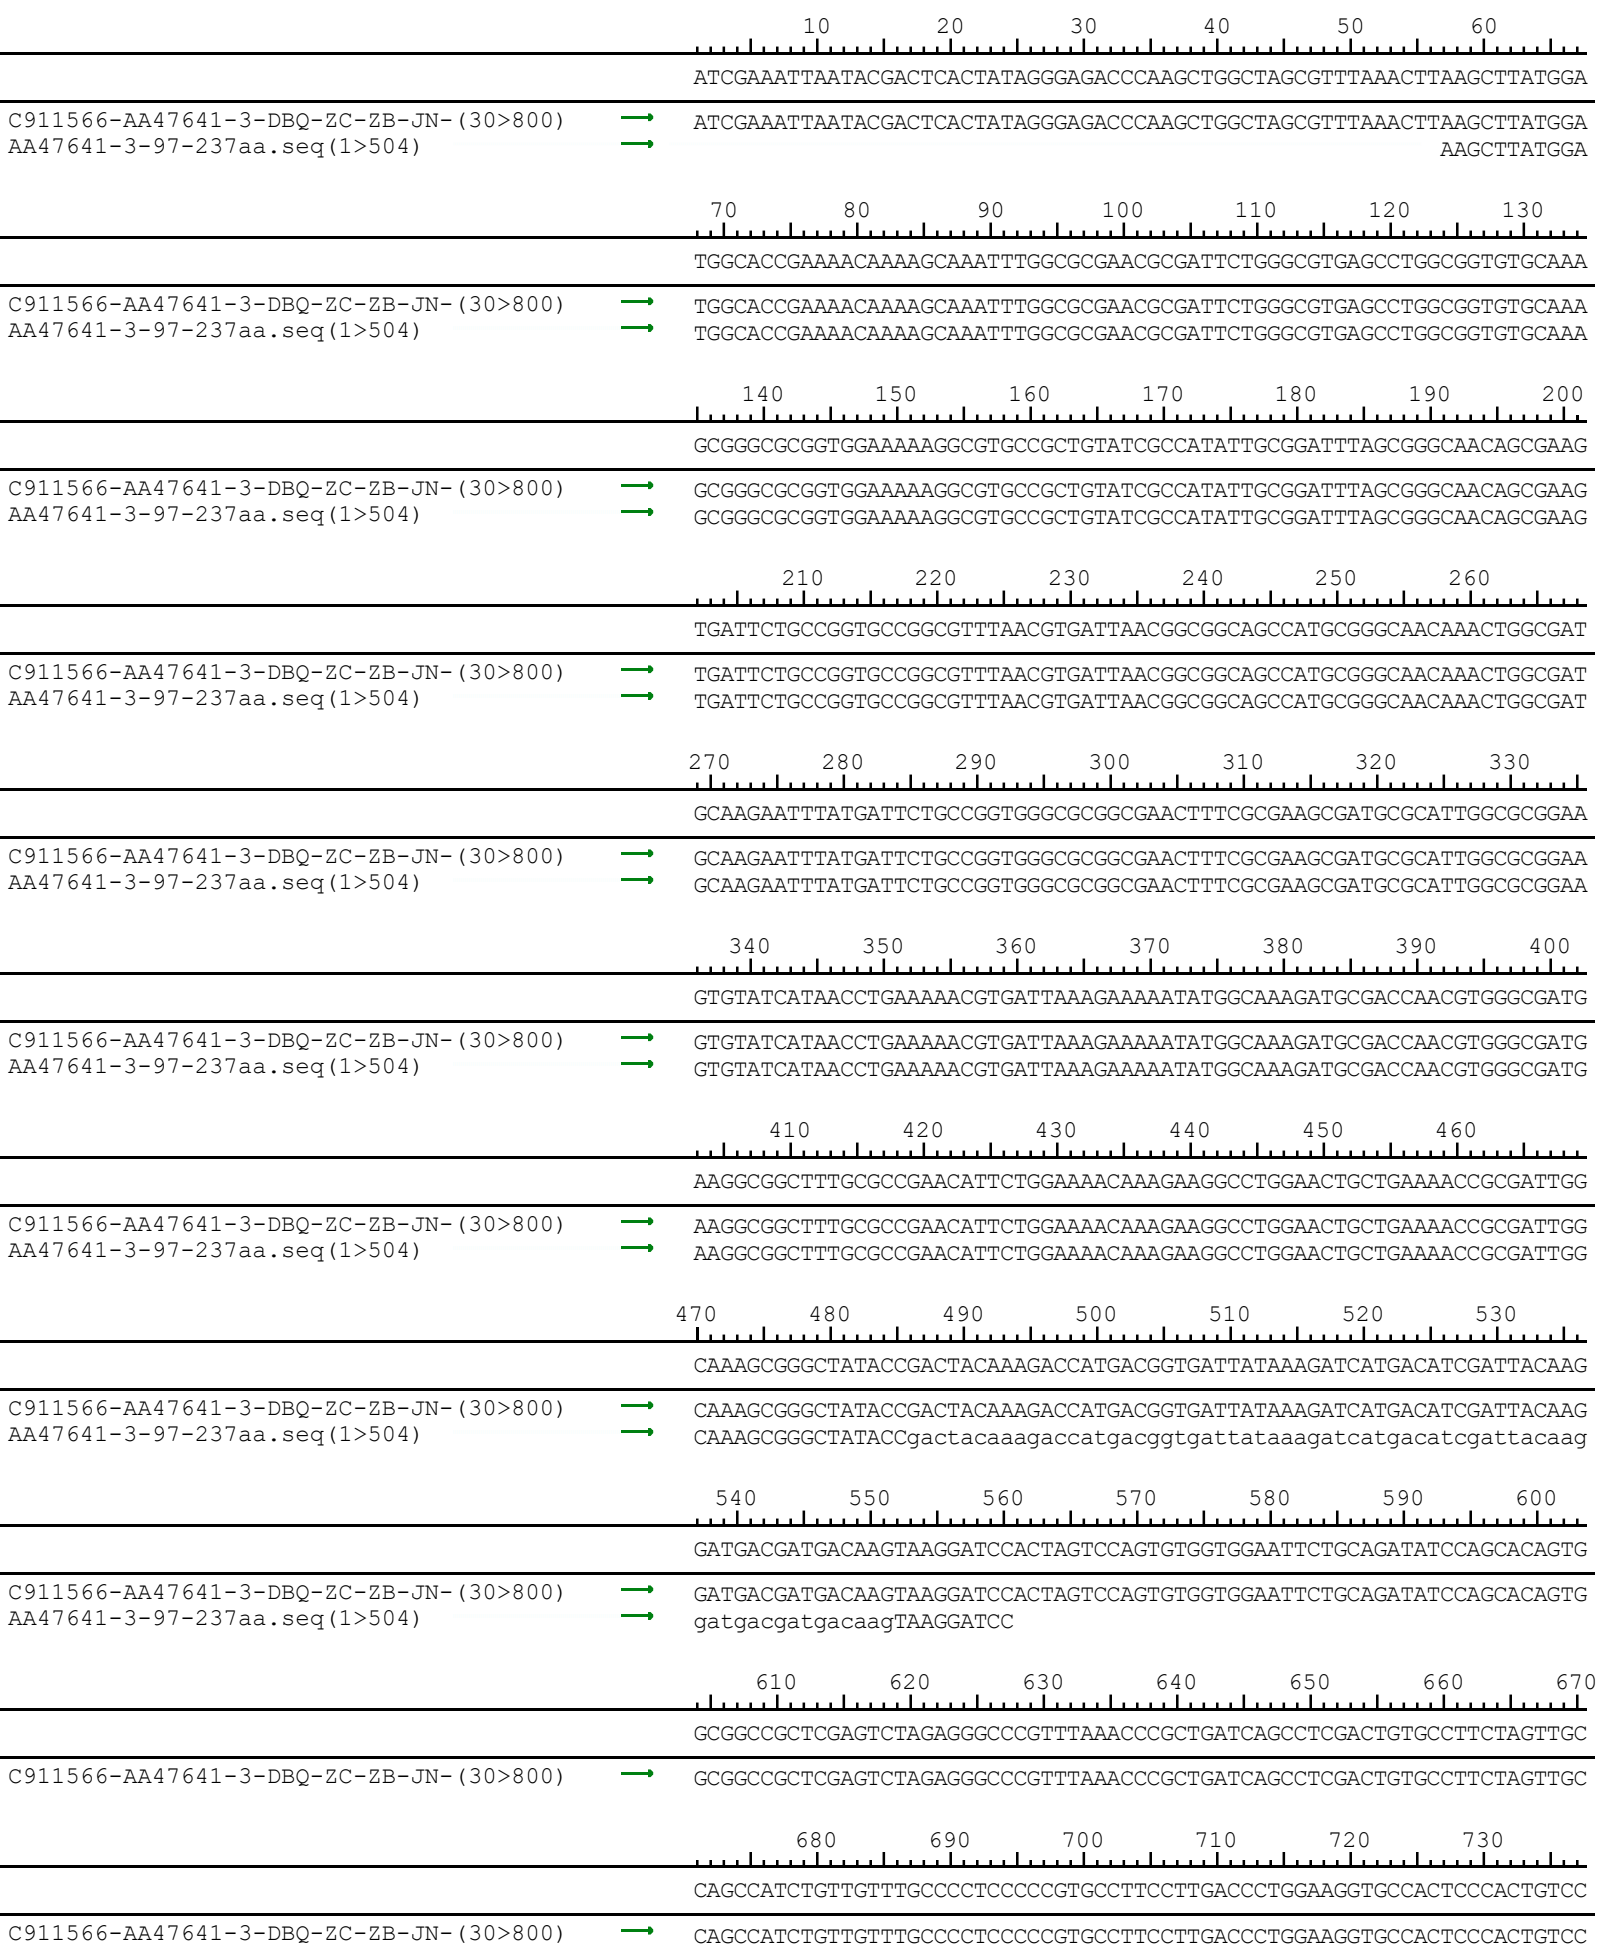

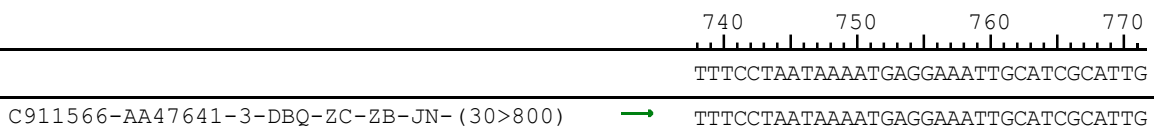

Supplement: Supplementary_file_3.zip [file Supplementary_file_3.zip]
